# Supplementary material for: Focal Boost in Prostate Cancer Radiotherapy: A Review of Planning Studies and Clinical Trials
Source: MDPI journal article supplement (doi:10.3390/cancers15194888), 2023-10-08
Supplement: s1 [file s1]

# Supplemental Material

## Note

“N” represents the reported number of patients/plans who have been focal boosted or included in statistics of dose metrics.

The format of dose metrics reported in “Dose Statistics” is: **reported target volume-[statistics of cohort (sub-statistics)/(unit)]**.

- For example, the reporting format of “**PTVboost-[Median(range)/Gy]**” the reported dose metrics of “**Dmedian = 55.3 (49.5~61.8)**” means: for the target volume of “PTVboost”, the median of Dmedian in investigated cohort is 55.3 Gy with range of 49.5 to 61.8.

The reported dose metrics included:

- DX: (Maximum) Dose received by X% of the volume
- DXcc: (Maximum) Dose received by X cc of the volume.
- DX%: Percent of isodose received by X% volume of the volume.
- VX: The percentage volume receiving  $\geq$  XGy
- VX%: Percent of the volume received X% of prescribed dose.

# Table S1

Table S1: Summarized characteristics of reviewed planning studies.

| Authors, Year            | N  | Boost Modality  | GTV identification modality | Volume definition and margins (mm) |                                                     | GTV/boost Volume (cc)                                                               | Dose and Fractions (fx) |                            |    | Dose Statistics                                                   |                                                                        |                                      |                                                                |
|--------------------------|----|-----------------|-----------------------------|------------------------------------|-----------------------------------------------------|-------------------------------------------------------------------------------------|-------------------------|----------------------------|----|-------------------------------------------------------------------|------------------------------------------------------------------------|--------------------------------------|----------------------------------------------------------------|
|                          |    |                 |                             | CTV                                | PTV                                                 |                                                                                     | PTV                     | GTV [BED]                  | fx | Prostate                                                          | GTV                                                                    | Bladder                              | Rectum                                                         |
| Cambria et al., 2012 [1] | 10 | IMPT (2 fields) | mpMRI (T2w+DCE+DWI)         | CTV = prostate                     | PTV = CTV + 5 (3 posteriorly)<br>PTVboost = GTV + 3 | [GTV]:<br>Vmean = 1.7 (95%CI: 1~2.7)<br>[PTVboost]:<br>Vmean = 6.2 (95%CI: 3.8~8.6) | PTV = 36.25 Gy          | PTVboost = 37.5 Gy [128.2] | 5  | PTV-[Mean/%]: D98% = 94.8; D95% = 96.8; D50% = 103.4; D2% = 107.6 | PTVboost-[Mean/%]: D98% = 98.4; D95% = 98.8; D50% = 101; D2% = 103.9   | [Mean/%]: V100% = 1.01; V50% = 8.76  | [Mean/%]: V50% = 11.03; V80% = 5.22; V90% = 2.68; V100% = 0.69 |
|                          |    | IMPT (5 fields) |                             |                                    |                                                     |                                                                                     |                         |                            |    | PTV-[Mean/%]: D98% = 96.4; D95% = 99.6; D50% = 103.6; D2% = 107.4 | PTVboost-[Mean/%]: D98% = 98.7; D95% = 99.0; D50% = 100.7; D2% = 104.0 | [Mean/%]: V100% = 0.49; V50% = 8.05  | [Mean/%]: V50% = 8.81; V80% = 3.8; V90% = 2.17; V100% = 0.4    |
|                          |    | VMAT            |                             |                                    |                                                     |                                                                                     |                         |                            |    | PTV-[Mean/%]: D98% = 96.4; D95% = 96.8; D50% = 99.8; D2% = 104.7  | PTVboost-[Mean/%]: D98% = 96.5; D95% = 97.0; D50% = 99.3; D2% = 102.1  | [Mean/%]: V100% = 0.68; V50% = 12.41 | [Mean/%]: V50% = 18.91; V80% = 6.5; V90% = 3.2; V100% = 0.27   |
|                          |    | IMRT            |                             |                                    |                                                     |                                                                                     |                         |                            |    | PTV-[Mean/%]: D98% = 94.3; D95% = 96.7; D50% = 100.3; D2% = 102.4 | PTVboost-[Mean/%]: D98% = 96.3; D95% = 97.5; D50% = 99.6; D2% = 101.3  | [Mean/%]: V100% = 0.66; V50% = 11.15 | [Mean/%]: V50% = 11.63; V80% = 4.56; V90% = 1.68; V100% = 0.09 |

|                                                |    |            |                      |                                                  |                                                          |                                                    |                                                                      |                                                                                                                     |   |                                                                                |                                                                                                                                                            |                                                                                                                                                       |                                                                                                                                                          |
|------------------------------------------------|----|------------|----------------------|--------------------------------------------------|----------------------------------------------------------|----------------------------------------------------|----------------------------------------------------------------------|---------------------------------------------------------------------------------------------------------------------|---|--------------------------------------------------------------------------------|------------------------------------------------------------------------------------------------------------------------------------------------------------|-------------------------------------------------------------------------------------------------------------------------------------------------------|----------------------------------------------------------------------------------------------------------------------------------------------------------|
| Udrescu et al., 2013 [2]                       | 9  | IMRT       | mpMRI (T2w+DCE)      | CTV = prostate                                   | PTV = CTV + 3<br>PTVboost = GTV + 5                      | [PTVboost]:<br>Vmean = 15.0cc<br>(range: 7.9~27.2) | PTV = 32.5 Gy                                                        | PTVboost = 40 Gy [143.2]                                                                                            | 5 | The average PTV coverage by the 95% isodoseline was 98.85% (range 97.8~99.81%) | The average PTVboost coverage by the 95% isodoseline was 99.36% (range 97.72~99.98%).                                                                      | [Mean(range)/Gy]: D2,5,10,25 cc = 31.5 (26~34), 26.4 (17.5~32.4), 20.6 (10.2~29.2), 10.9 (2.3~19.5); Dmean = 7.8 (3.2~16.1); Dmax = 37.3 (34.2~41.9). | [Mean(range)/Gy]: D2,5,10,25cc = 35.6 (33.2~38.7), 31.9 (29.8~34.8), 26.6 (23.3~30.7), 14.9 (11.9~16.8); Dmean = 11.2 (9.2~13.4); Dmax = 42 (40.3~43.2). |
| Y. J. Kim, Yoon, & Kim, 2020 [3]               | 15 | CyberKnife | mpMRI (T2w+DWI)      | CTV = prostate and proximal SV                   | PTV was a 2–3 mm expansion of CTV.                       | Vmedian = 1.3 (range: 0.7–6.6)                     | Postate = 35 Gy                                                      | GTV = 40 Gy [143.2]                                                                                                 | 5 | Prostate-<br>[Mean(SD)/Gy]: D95 = 35.10 (0.81)                                 | GTV-<br>[Mean(SD)/Gy]: D95 = 38.85 (0.80)                                                                                                                  | [Mean(SD)/Gy]: Dmax = 37.31 (0.83)<br>[Mean(SD)/cc]: D35.7Gy = 0.46 (0.30)                                                                            | [Mean(SD)/Gy]: Dmax = 34.96 (1.48)<br>[Mean(SD)/cc]: D30.8Gy = 1.00 (1.23)                                                                               |
|                                                |    |            | mpMRI (T2w) + biopsy |                                                  |                                                          |                                                    |                                                                      | GTV = 45 Gy [175.6]                                                                                                 | 5 | Prostate-<br>[Mean(SD)/Gy]: D95 = D95 = 35.23 (0.68)                           | GTV-<br>[Mean(SD)/Gy]: D95 = 42.89 (1.09)                                                                                                                  | [Mean(SD)/Gy]: Dmax = 39.13 (2.07)<br>[Mean(SD)/cc]: D35.7Gy = 1.17 (1.50)                                                                            | [Mean(SD)/Gy]: Dmax = 37.15 (3.44)<br>[Mean(SD)/cc]: D30.8Gy = 2.14 (2.67)                                                                               |
| Tree, Jones, Sohalib, Khoo, & van As, 2013 [4] | 15 | VMAT       | mpMRI (T2w+DWI)      | CTV = prostate + proximal SV;                    | PTV = CTV + 5 (3 posteriorly)                            | [GTV]<br>Vmean = 3.7                               | PTV = 36.25 Gy                                                       | GTV = 47.5 Gy [193.1]                                                                                               | 5 | NR                                                                             | [Median/Gy]: D95% = 47.5<br>[mean/Gy]: D95% = 47.4                                                                                                         | NR                                                                                                                                                    | [Mean/Gy]: D50,20,10,5 = 113.17, 24.37, 30.86, 34.29; D1cc = 36.78                                                                                       |
|                                                |    | CyberKnife |                      |                                                  |                                                          |                                                    |                                                                      |                                                                                                                     |   |                                                                                | [Mean/Gy]: D95% = 47.5<br>[mean/Gy]: D95% = 48.1                                                                                                           |                                                                                                                                                       | [Mean/Gy]: D(0,20,10,5 = 15.52, 27.13, 32.40, 35.32; D1cc = 37.15                                                                                        |
|                                                |    | VMAT       |                      |                                                  | PTV = CTV + 8 (5 posteriorly)                            |                                                    |                                                                      |                                                                                                                     |   |                                                                                | [Mean/Gy]: D95% = 46.9                                                                                                                                     |                                                                                                                                                       | [Mean/Gy]: D50,20,10,5 = 14.59, 28.28, 34.61, 36.63; D1cc = 37.7                                                                                         |
| Murray et al., 2014 [5]                        | 10 | VMAT       | mpMRI (DWI+T2w+DCE)  | CTV1 = prostate<br>CTV2 = prostate + proximal SV | PTVboost = GTV + 4<br>PTV1 = CTV1 + 6<br>PTV2 = CTV2 + 6 | [PTVboost]<br>Vmedian = 3.4 (range: 1.5~51.6)      | PTV1 = 42.7 Gy<br>PTV1 = 42.7 Gy<br>PTV2 = 32.4 Gy<br>PTV1 = 42.7 Gy | PTVboost = increased in 5% increments starting at 115% of the PTV1 prescription until dose constraints were reached | 7 | NR                                                                             | PTVboost-<br>[Median(range)/Gy]: Dmedian = 55.1 (49.6~62.6)<br>PTVboost-<br>[Median(range)/Gy]: Dmedian = 54.9 (50.1~62.5)<br>PTVboost-<br>[Median(range)/ | NR                                                                                                                                                    | NR                                                                                                                                                       |

|                                                      |    |                               |                     |                                                                |                                                                                                  |                                                                         |                                   |                              |    |                                                                                                     |                                                                                                        |                                                                                                       |                                                                                                                |
|------------------------------------------------------|----|-------------------------------|---------------------|----------------------------------------------------------------|--------------------------------------------------------------------------------------------------|-------------------------------------------------------------------------|-----------------------------------|------------------------------|----|-----------------------------------------------------------------------------------------------------|--------------------------------------------------------------------------------------------------------|-------------------------------------------------------------------------------------------------------|----------------------------------------------------------------------------------------------------------------|
|                                                      |    |                               |                     |                                                                |                                                                                                  |                                                                         | PTV2 = 36.5 Gy                    |                              |    |                                                                                                     |                                                                                                        | Gy]: Dmedian = 55.3 (49.5~61.8)                                                                       |                                                                                                                |
| Ashida et al., 2022 [6]                              | 14 | VMDWAT                        | mpMRI (DWI+T2w)     | CTV = Prostate + proximal SV                                   | PTV = CTV + 8 (6 posteriorly)<br>PTVboost = GTV + 3                                              | [GTV]<br>Vmean = 2.40 (SD: 2.31)                                        | PTV = 54 Gy                       | PTVboost = 57 Gy [126.9]     | 15 | PTV-<br>[Mean(SD)/Gy]:<br>D95 = 51.25 (0.28); D50 = 54.81 (0.24); D2 = 56.51 (SD: 0.21)             | PTVboost-<br>[Mean(SD)/Gy]:<br>D95 = 55.04 (0.76); D50 = 57.07 (0.13); D2 = 58.82 (SD: 0.49)           | [Mean(SD)/%]:<br>V30Gy = 26.45 (7.26); V50Gy = 14.99 (4.49)                                           | [Mean(SD)/%]: V30Gy = 39.36 (5.38); V50Gy = 10.44 (2.55)                                                       |
| Ciabatti et al., 2019 [7]                            | 12 | VMAT (without sexual sparing) | mpMRI (DWI+T2w+DCE) | CTV1 = prostate<br>CTV2 = SV                                   | PTV1 = CTV1 + 5<br>PTV2 = CTV2 + 5<br>PTVboost = GTV + 5                                         | [GTV]:<br>Vmean = 0.5 (0.1-6.8)<br>[PTVboost]:<br>Vmean = 7.6 (SD: 6.2) | PTV1 = 67.5 Gy<br>PTV2 = 56.25 Gy | PTVboost = 75 Gy [147.6]     | 25 | PTV1-<br>[Mean(SD)/Gy]:<br>Dmean = 68.9 (1.2); D95 = 66.3 (0.7); D50 = 68.1 (1.2); D2 = 76.2 (1.4)  | PTVboost-<br>[Mean(SD)/Gy]:<br>Dmean = 75.7 (1.2); D95 = 73.6 (0.9); D50 = 75.9 (1.2); D2 = 77.6 (1.8) | [Mean(SD)/Gy]:<br>Dmean = 23.8 (7.9); D2 = 68.0 (2.2)<br>[Mean/%]:<br>V80,75,70,65 = 1.5,5.6,8.4,10.9 | [Mean(SD)/Gy]:<br>Dmean = 38.1 (7.0);<br>D2 = 68.8 (2.9)<br>[Mean/%]:<br>V80,75,70,65 = 6.1,9.7,13.4,17.2,29.9 |
|                                                      |    | VMAT (with sexual sparing)    |                     |                                                                |                                                                                                  |                                                                         |                                   |                              |    | PTV1-<br>[Mean(SD)/Gy]:<br>Dmean = 68.8 (0.9); D95 = 65.9 (0.9); D50 = 68.0 (0.8); D2 = 76.4 (1.1)  | PTVboost-<br>[Mean(SD)/Gy]:<br>Dmean = 75.8 (0.8); D95 = 73.9 (0.8); D50 = 75.9 (0.8); D2 = 77.7 (1.3) | [Mean(SD)/Gy]:<br>Dmean = 23.2 (8.1); D2 = 67.9 (1.7)<br>[Mean/%]:<br>V80,75,70,65 = 3.9,5.2,5.9,6.6  | [Mean(SD)/Gy]:<br>Dmean = 38.1 (7.3);<br>D2 = 68.7 (2.2)<br>[Mean/%]:<br>V80,75,70,65 = 5.4,9.1,12.9,17.2,30.9 |
| Azzeroni et al., 2012 [8]                            | 7  | IMRT                          | mpMRI (T1w+T2w+DWI) | CTV = prostate + SV                                            | PTVboost = GTV + 5<br>PTV = CTV + 8 (10 in cranial-caudal direction)                             | NR                                                                      | Biologically optimized            | Biologically optimized       | 28 | Median doses were in the range of 69-77 Gy                                                          | Median doses were in the range of 94-116 Gy                                                            | NR                                                                                                    | NR                                                                                                             |
| Amini, Westerdal, Waxweiler, Ryan, & Raben, 2015 [9] | 10 | VMAT                          | Biopsies            | CTV1 = involved lobe<br>CTV2 = uninvolved lobe                 | PTV = CTV1 + 5 (3 posteriorly) + 3 mm lateral margin overlapping the CTV2                        | NR                                                                      | Uninvolved lobe: 50.4 Gy          | Involved lobe: 70 Gy [126.5] | 28 | Uninvolved lobe-<br>[Mean/Gy]:<br>Dmean = 55.5 (range: 54.1~56.5)                                   | Involved lobe-<br>[Mean]: Dmean = 72.2 (range: 71.6~73.5)                                              | [Mean/Gy]:<br>Dmean = 13.0 (range: 3.1~23.9)<br>[Mean/%]: V70 = 1.69, V60 = 3.79, V50 = 6.96          | [Mean/Gy]: Dmean = 21.0 (range: 13.9~27.0)<br>[Mean/%]: V70 = 2.01; V60 = 5.69, V50 = 10.06                    |
| Thomas et al., 2018 [10]                             | 21 | VMAT                          | PET-CT (68Ga-PSMA)  | CTV1 = prostate<br>CTV2 = SV<br>GTV = PET defined boost volume | PTV1 = CTV1 + 7 (4 inferiorly and posteriorly)<br>PTV2 = CTV2 + 7 (4 inferiorly and posteriorly) | NR                                                                      | PTV1 = 70 Gy<br>PTV2 = 59.2 Gy    | GTV = 75.6 Gy [141.4]        | 28 | PTV1-<br>[Mean(SD)/Gy]:<br>Dmean = 74.1(2.9); D1 = 79.9 (1.2)<br>-[Mean(SD)/%]:<br>V95 = 69.6(1.0); | GTV-<br>[Mean(SD)/Gy]:<br>Dmean = 78.0 (0.8); D1 = 81.0 (1.5)<br>-[Mean(SD)/%]:<br>V95 = 75.6% (0.2%); | [Mean/Gy]:<br>Dmean = 38.6 (9.9); D1 = 74.5 (1.5)                                                     | [Mean/Gy]: Dmean = 27.5 (3.0); D1 = 67.8 (4.1)                                                                 |
|                                                      |    |                               |                     |                                                                |                                                                                                  |                                                                         |                                   | GTV = 80 Gy [153.7]          |    | PTV1-<br>[Mean(SD)/Gy]:<br>Dmean = 76.1(1.1); D1 =                                                  | GTV-<br>[Mean(SD)/Gy]:<br>Dmean = 83.4 (1.1); D1 = 87.1                                                | [Mean/Gy]:<br>Dmean = 39.9 (10.8); D1 = 77.7 (2.2)                                                    | [Mean/Gy]: Dmean = 27.1 (3.8); D1 = 70.1 (4.3)                                                                 |



|                             |    |      |                                              |                                                                                      |                                                                                                                                                                                    |                                                                |              |                          |    |                                                                              |                                                                              |                                                                                 |                                                                                 |
|-----------------------------|----|------|----------------------------------------------|--------------------------------------------------------------------------------------|------------------------------------------------------------------------------------------------------------------------------------------------------------------------------------|----------------------------------------------------------------|--------------|--------------------------|----|------------------------------------------------------------------------------|------------------------------------------------------------------------------|---------------------------------------------------------------------------------|---------------------------------------------------------------------------------|
| Nutting et al., 2002 [13]   | 6  | IMRT | Histopathologic data                         | CTV = prostate                                                                       | PTV = CTV + 10                                                                                                                                                                     | [DIL]:Vmean = 4.3 (std:2.1), Vmedian = 2.8 (range:1.9~7.2)     | PTV = 70 Gy  | GTV = 90 Gy [164.7]      | 35 | PTV- [mean(SD)/Gy]: Dmean = 76.1 (1.8), Dmin = 67.4 (0.2), Dmax = 89.6 (1.2) | DIL- [mean(SD)/Gy]: Dmean = 89.1 (1.4), Dmin = 86.8 (1.4), Dmax = 92.7 (1.9) | [mean/Gy]: Dmax = 74.1 (1.9)<br>[mean/%]: V90,80,50,20 = 21.1, 25.6, 42.5, 61.8 | [mean/Gy]: Dmax = 81.8 (3.8)<br>[mean/%]: V90,80,50,20 = 27.2, 36.6, 69.5, 90.6 |
|                             |    |      |                                              |                                                                                      |                                                                                                                                                                                    | [non-DIL]:Vmean = 0.6 (std:0.3), Vmedian = 0.5 (range:0.2~1.2) |              |                          |    | PTV- [mean(SD)/Gy]: Dmean = 74.7 (1.9), Dmin = 67.6 (0.3), Dmax = 88.6 (0.6) | DIL- [mean(SD)/Gy]: Dmean = 89.0 (0.2), Dmin = 86.3 (0.7), Dmax = 92.0 (1.1) | [mean/Gy]: Dmax = 74.9 (1.1)<br>[mean/%]: V90,80,50,20 = 19.9, 24.3, 40.3, 59.6 | [mean/Gy]: Dmax = 81.8 (1.6)<br>[mean/%]: V90,80,50,20 = 28.7, 39.0, 69.7, 89.7 |
| van Lin et al., 2006 [14]   | 5  | IMRT | mpMRI (DCE+T2w) + MRSI(1H-spectroscopic MRI) | CTV = prostate                                                                       | PTV =CTV + 7<br>PTVboost = GTV+5                                                                                                                                                   | Vmean = 2.7 cc (sd: 1.9), Vmedian = 1.8 (range:1.1~6.5)        | PTV = 70 Gy  | PTVboost = 90 Gy [164.7] | 35 | [mean(SD,range)/Gy]: Dmean = 71.5 (0.1, range: 71.3~71.6)                    | [mean]: Dmean = 90.6 (0.4, range: 90.0~91.2);                                | NR                                                                              | NR                                                                              |
| Zamboglou et al., 2018 [15] | 10 | IMRT | PET-CT (68Ga-PSMA)                           | CTV1 = Prostate + SV<br>CTV2 = Prostate + partial SV<br>GTVPET = PET-CT defined DILs | PTV1, PTV2, PTVPET, PTVMRI, and PTVunion were expanded by adding an isotropic margin of 4 mm to each CTV/GTV.<br><br>GTVhist represent the histology data defined GTV (i.e. IPLs). | Vmean = 7.3 (std:4.4), Vmedian = 6.4 (range:1.9~15.5)          | PTV2 = 77 Gy | GTVPET = 95 Gy [178.2]   | 35 | NR                                                                           | GTVhist- [Mean(SD)/Gy]: Dmean = 95.3 (2.6)                                   | NR                                                                              | NR                                                                              |
|                             |    |      | mpMRI (T2w+DWI+DCE)                          | CTV1 = Prostate + SV<br>CTV2 = Prostate + partial SV<br>GTMRI = mpMRI                | Volume of GTVhist: Vmean = 7.0 (std:6.4), Vmedian = 4.1 (range:1.4~19.8)                                                                                                           | Vmean = 4.8 (std:4.3), Vmedian = 2.6 (range:0.7~15.5)          |              | GTMRI = 95 Gy [178.2]    |    |                                                                              | GTVhist- [Mean(SD)/Gy]: Dmean =93.3 (2.6)                                    |                                                                                 |                                                                                 |

[illegible]

|                           |    |                 |                      |                                                                                                    |                                                                                                                         |                                                                          |                            |                             |    |                                                                                                                                                |                                                                                         |                                                                                                                                    |                                                                                                                           |
|---------------------------|----|-----------------|----------------------|----------------------------------------------------------------------------------------------------|-------------------------------------------------------------------------------------------------------------------------|--------------------------------------------------------------------------|----------------------------|-----------------------------|----|------------------------------------------------------------------------------------------------------------------------------------------------|-----------------------------------------------------------------------------------------|------------------------------------------------------------------------------------------------------------------------------------|---------------------------------------------------------------------------------------------------------------------------|
| Blake et al., 2020 [16]   | 12 | IMRT            | mpMRI (DWI+T2w+DCE)  | CTV1 = Prostate + SV<br>CTV2 = Prostate + involved SV<br>CTVboost = GTV + 3                        | PTV1 = CTV1 + 10<br>PTV2 = CTV2 + 5<br>PTVboost = CTVboost + 3                                                          | [PTVboost]:<br>Vmean = 6.9 (std:5.0),<br>Vmedian = 5.9 (range:2.2~20.1). | PTV2 = 74 Gy               | PTVboost = 86 Gy [150.5]    | 37 | NR                                                                                                                                             | NR                                                                                      | [Median/Gy]:<br>Dmean = 29.6,<br>D1cc = 75.1                                                                                       | [Median/Gy]: Dmean = 36.8 Gy, D1cc = 74.6                                                                                 |
| Pinkawa et al., 2010 [17] | 65 | IMRT            | PET-CT (18F-choline) | CTV = prostate                                                                                     | PTV = CTV + 8 (in lateral and anterior) + 5 (in cranial-caudal) + 4 (posteriorly)<br>PTVboost = GTV + 4 (3 posteriorly) | [GTV]<br>Vmean = 6.2                                                     | PTV = 76 Gy                | PTVboost = 80 Gy [134.3]    | 38 |                                                                                                                                                |                                                                                         | NR                                                                                                                                 | NR                                                                                                                        |
| Pinkawa et al., 2009 [18] | 12 | IMRT            | PET-CT (18F-choline) | CTV = prostate volume (including base of seminal vesicles for intermediate and high risk patients) | PTV = CTV + 8 (in lateral and anterior) + 5 (in cranial-caudal) + 4 (posteriorly)<br>PTVboost = GTV + 4 (3 posteriorly) | Vmean = 6 (range:1~16)                                                   | PTV = 76 Gy                | PTVboost = 80 Gy [134.3]    | 38 | PTV-<br>[Mean(SD)/Gy]:<br>Dmax = 83.2 (0.6); Dmean = 77.9 (0.8); Dmin = 73.0 (1.0)                                                             | PTVboost-<br>[Mean(SD)/Gy]:<br>Dmax = 81.9 (0.8); Dmean = 80.3 (0.3); Dmin = 78.4 (0.8) | [Mean(SD)/Gy]:<br>Dmax = 78.4 (1.6); Dmean = 28.4 (10.3); Dmin = 2.1 (2.4)<br>[Mean(SD)/%]:<br>V70 = 10.1 (6.1); V50 = 24.3 (12.4) | [Mean(SD)/Gy]: Dmax = 75.1 (2.9); Dmean = 34.5 (5.4); Dmin = 4.1 (4.6)<br>[Mean(SD)/%]: V70 = 6.4 (2.6); V50 = 24.0 (5.9) |
|                           |    |                 |                      |                                                                                                    |                                                                                                                         |                                                                          | PTV = 66.6 Gy              | PTVboost = 83.25 Gy [143.7] | 37 | PTV-<br>[Mean(SD)/Gy]:<br>Dmax = 85.7 (1.0); Dmean = 73.8 (3.4); Dmin = 65.8 (0.9)                                                             | PTVboost-<br>[Mean(SD)/Gy]:<br>Dmax = 85.7 (1.0); Dmean = 83.3 (0.0); Dmin = 80.4 (1.2) | [Mean(SD)/Gy]:<br>Dmax = 72.8 (4.8); Dmean = 46.5 (7.1); Dmin = 0.7 (0.3)<br>[Mean(SD)/%]:<br>V70 = 2.5 (2.8); V50 = 13.4 (9.9)    | [Mean(SD)/Gy]: Dmax = 66.8 (7.1); Dmean = 25.5 (4.4); Dmin = 1.2 (0.5)<br>[Mean(SD)/%]: V70 = 1.5 (1.3); V50 = 13.8 (5.1) |
| Ost et al., 2011 [19]     | 12 | IMRT (3 fields) | MRI + MRSI           | CTV = prostate + SV                                                                                | PTV = CTV + 4                                                                                                           | NR                                                                       | CTV = 72 Gy<br>PTV = 68 Gy | GTV = 80 Gy [134.3]         | 38 | CTV-<br>[Mean(SD)/Gy]:<br>D98 = 75 (2); Dmean = 80 (2); Dmin = 86 (2)<br>PTV-<br>[Mean(SD)/Gy]:<br>D98 = 71 (2); Dmean = 78 (2); Dmin = 86 (2) | GTV-<br>[Mean(SD)/Gy]:<br>D98 = 82 (2); Dmean = 85 (2); Dmin = 86 (2);                  | [Mean(SD)/%]:<br>V20 = 81 (11); V40 = 64 (13); V60 = 38 (10); V70 = 19 (6)                                                         | [Mean(SD)/%]: V40 = 41 (18); V70 = 8 (4)                                                                                  |



|                           |    |  |      |                                                        |                                    |                                                |                                                                                              |                |                          |    |                                                                                                                                                            |                                                                                                    |                                                                                                           |                                                                                                     |
|---------------------------|----|--|------|--------------------------------------------------------|------------------------------------|------------------------------------------------|----------------------------------------------------------------------------------------------|----------------|--------------------------|----|------------------------------------------------------------------------------------------------------------------------------------------------------------|----------------------------------------------------------------------------------------------------|-----------------------------------------------------------------------------------------------------------|-----------------------------------------------------------------------------------------------------|
|                           |    |  |      |                                                        |                                    |                                                |                                                                                              |                |                          |    | CTV-<br>[Mean(SD)/Gy]:<br>D98 = 79 (2);<br>Dmean = 86 (4);<br>Dmin = 93 (5)<br>PTV-<br>[Mean(SD)/Gy]:<br>D98 = 73 (2);<br>Dmean = 84 (5);<br>Dmin = 92 (6) | GTV-<br>[Mean(SD)/Gy]:<br>D98 = 89 (6);<br>Dmean = 93 (6);<br>Dmin = 94 (5);                       | [Mean(SD)/%]:<br>V20 = 83 (11);<br>V40 = 70 (11);<br>V60 = 35 (7);<br>V70 = 14 (5)                        | [Mean(SD)/%]: V40 =<br>40 (17); V70 = 9 (4)                                                         |
|                           |    |  |      |                                                        |                                    |                                                |                                                                                              |                |                          |    | [CTV/Mean(SD)]:<br>D98 = 80 (3);<br>Dmean = 88 (3);<br>Dmin = 95 (5)<br>PTV-<br>[Mean(SD)/Gy]:<br>D98 = 73 (2);<br>Dmean = 85 (3);<br>Dmin = 94 (5)        | GTV-<br>[Mean(SD)/Gy]:<br>D98 = 89 (6);<br>Dmean = 94 (5);<br>Dmin = 96 (5);                       | [Mean(SD)/%]:<br>V20 = 81 (11);<br>V40 = 63 (12);<br>V60 = 28 (7);<br>V70 = 11 (5)                        | [Mean(SD)/%]: V40 =<br>34 (17); V70 = 8 (5)                                                         |
|                           |    |  |      |                                                        |                                    |                                                |                                                                                              |                |                          |    | CTV-<br>[Mean(SD)/Gy]:<br>D98 = 78 (3);<br>Dmean = 88 (3);<br>Dmin = 95 (5)<br>PTV-<br>[Mean(SD)/Gy]:<br>D98 = 72 (2);<br>Dmean = 85 (3);<br>Dmin = 94 (5) | GTV-<br>[Mean(SD)/Gy]:<br>D98 = 89 (6);<br>Dmean = 95 (5);<br>Dmin = 96 (5);                       | [Mean(SD)/%]:<br>V20 = 67 (8);<br>V40 = 43 (8);<br>V60 = 22 (5);<br>V70 = 9 (2)                           | [Mean(SD)/%]: V40 =<br>30 (15); V70 = 8 (3)                                                         |
|                           |    |  |      |                                                        |                                    |                                                |                                                                                              |                |                          |    |                                                                                                                                                            |                                                                                                    |                                                                                                           |                                                                                                     |
| Bossart et al., 2016 [20] | 5  |  | VMAT | mpMRI<br>(T2w+T<br>1w+DW<br>I+DCE)<br>or/and<br>biopsy | CTV =<br>prostate +<br>proximal SV | PTV = CTV + 3-<br>5                            | [GTV]<br>Vmean =<br>3.9<br>(range:0.6~<br>11.7)                                              | PTV = 76<br>Gy | GTV = 89.3<br>Gy [157.0] | 88 | prostate-<br>[Mean(range)/Gy<br>]: D95 = 78.2<br>(76.5-81.1);<br>Dmean = 84.4<br>(73.7-94.8)                                                               | GTV-[Mean<br>(range)/Gy]: D95<br>= 89.7 (89.3-<br>90.3); Dmean =<br>91.7 (87.0-94.8)               | [Mean<br>(range)/%]: V40<br>= 33.3 (10.4-<br>51.5); V65 =<br>13.9 (4.8-33.0);<br>V80 = 3.7 (1.0-<br>12.3) | [Mean (range)/%]: V40<br>= 26.8 (20.4-36.0); V65<br>= 9.6 (4.6-12.3); V80 =<br>0.8 (0.1-2.4)        |
|                           | 15 |  |      |                                                        |                                    | [GTV]<br>Vmean =<br>2.5<br>(range:0.4~<br>9.2) | prostate-<br>[Mean(range)/Gy<br>]: D95 = 77.8<br>(76.7-79.4);<br>Dmean = 80.6<br>(76.0-94.7) |                |                          |    | GTV-[Mean<br>(range)/Gy]: D95<br>= 89.0 (88.9-<br>89.4); Dmean =<br>91.5 (86.8-94.7)                                                                       | [Mean<br>(range)/%]: V40<br>= 16.9 (3.9-<br>26.4); V65 = 6.7<br>(1.4-11.2); V80<br>= 1.3 (0.0-4.5) | [Mean (range)/%]: V40<br>= 16.3 (6.7-28.3); V65<br>= 4.0 (1.0-8.8); V80<br>=0.1 (0.0-0.2)                 |                                                                                                     |
|                           | 20 |  |      |                                                        |                                    | PTV = CTV + 3-<br>5<br>PTVboost = GTV<br>+ 3   | NR                                                                                           |                |                          |    | PTVboost =<br>89.3 Gy<br>[157.0]                                                                                                                           | prostate-<br>[Mean(range)/Gy<br>]:D95 = 80.3<br>(77.9-81.7);<br>Dmean = 85.0<br>(83.9-86.7)        | GTV-[Mean<br>(range)/Gy]: D95<br>= 93.2 (92.6-<br>94.4); Dmean =<br>94.6 (93.9-96.9)                      | [Mean<br>(range)/%]: V40<br>= 25.0 (20.2-<br>31.9); V65 = 9.4<br>(8.1-10.8); V80<br>= 2.5 (1.6-3.7) |

|                                                         |    |      |                                    |                                                                                                             |                                                                                            |                                                                                        |                              |                                                   |    |                                                                                                       |                                                                                                                                        |                                                                                                                                    |                                                                                                                                     |
|---------------------------------------------------------|----|------|------------------------------------|-------------------------------------------------------------------------------------------------------------|--------------------------------------------------------------------------------------------|----------------------------------------------------------------------------------------|------------------------------|---------------------------------------------------|----|-------------------------------------------------------------------------------------------------------|----------------------------------------------------------------------------------------------------------------------------------------|------------------------------------------------------------------------------------------------------------------------------------|-------------------------------------------------------------------------------------------------------------------------------------|
| De Meerleer et al., 2005 [21]                           | 15 | IMRT | mpMRI (T1w+T2w)                    | CTV = prostate + SV                                                                                         | PTV = CTV + 7 (10 in cranial-caudal)                                                       | [GTV] Vmean = 10.5; Vmedian = 4 (range: 1-95)                                          | CTV = 78 Gy<br>PTV = 74 Gy   | GTV = 80 Gy                                       | NR | NR                                                                                                    | NR                                                                                                                                     | NR                                                                                                                                 | NR                                                                                                                                  |
| Chang et al., 2012 [22]                                 | 8  | IMRT | PET-CT (11C-choline)               | GTV60 = 60% of the maximum SUV<br>GTV70 = 70% of the maximum SUV<br>CTV1 = prostate + SV<br>CTV2 = prostate | PTV1 = CTV1 + 6<br>PTV2 = CTV2 + 6<br>PTV60 = GTV60 + 6<br>PTV70 = GTV70 + 6               | NR                                                                                     | PTV1 = 60 Gy<br>PTV2 = 78 Gy | PTV60 = 80 Gy [132.9]<br>PTV70 = 90 Gy            | 39 | NR                                                                                                    | NR                                                                                                                                     | NR                                                                                                                                 | NR                                                                                                                                  |
|                                                         |    |      |                                    |                                                                                                             |                                                                                            |                                                                                        | PTV1 = 60 Gy<br>PTV2 = 72 Gy | PTV60 = 84 Gy [142.4]<br>PTV70 = 90 Gy            |    |                                                                                                       |                                                                                                                                        |                                                                                                                                    |                                                                                                                                     |
| Kuang et al., 2015 [23]                                 | 30 | VMAT | PET-CT (18F-choline)               | GTV60 = 60% of the maximum SUV<br>GTV70 = 70% of the maximum SUV<br>CTV = prostate + 1 cm of bilateral SV   | PTV = CTV + 6 (3 in cranial-caudal)<br>PTV60/PTV70 = GTV60/GTV70 + 6 (3 in cranial-caudal) | [GTV60]: Vmedian = 2.7 (range: 0.3-10.8);<br>[GTV70]: Vmedian = 0.7 (range: 0.04-7.10) | PTV = 76 Gy                  | PTV60 = 100 Gy [182.7]<br>PTV70 = 105 Gy          | 39 | PTV- [Median(range)/Gy]: D95 = 79.5 (79.0~80.2); Dmean = 90.0 (84.5~92.4); Dmax = 108.3 (106.6~110.8) | PTV60- [Median(range)/Gy]: D95 = 102.3 (100.3~104.8); Dmean = 105.8 (102.5~107.0); Dmax = 109.6 (107.5~114.6); Dmin = 97.6 (86.5~99.4) | [Median(range)/Gy]: Dmax (range) = 83.2 (81.2~86.7); Dmean = 34.3 (8.4~51.2)<br>[Median(range)/%]: V80,75,70,65 = 1.6,7.0,9.2,12.1 | [Median(range)/Gy]: Dmax = 83.6 (64.5~89.0); Dmean = 35.6 (24.6~46.6)<br>[Median(range)/%]: V75,70,65,60,50 = 1.6,3.4,6.3,10.9,24.2 |
| Seppälä, Seppänen, Arponen, Lindholm, & Minn, 2008 [24] | 12 | IMRT | PET-CT (Carbon-11)                 | CTV = prostate                                                                                              | PTV = CTV + 6<br>PTVboost = GTV + 6                                                        | [GTV] Vmean = 5.4 (std:4.5), Vmedian = 3.1 (range:0.8~13.9)                            | PTV = 72.2 Gy                | PTVboost = 77.9 Gy, 81 Gy, 84 Gy, 87 Gy and 90 Gy | 41 | NR                                                                                                    | NR                                                                                                                                     | NR                                                                                                                                 | NR                                                                                                                                  |
| Housri et al., 2011 [25]                                | 24 | IMRT | mpMRI (T1w+T2w+DWI+DCE+MRS) + MRSI | CTV = prostate                                                                                              | PTVboost = GTV + 3<br>PTV = prostate + 9 (5 posteriorly)                                   | [GTV]: Vmean = 1.57                                                                    | PTV = 75.6 Gy                | PTVboost = 151.2 Gy (200% of the prescribed dose) | 42 | NR                                                                                                    | NR                                                                                                                                     | NR                                                                                                                                 | NR                                                                                                                                  |

|                                                                 |    |               |                                                 |                                                                                                         |                                                                       |                                                               |                                                           |                                 |                                                                                   |                                                                                                                 |                                                                                   |                                                                                   |                               |                                   |                                   |
|-----------------------------------------------------------------|----|---------------|-------------------------------------------------|---------------------------------------------------------------------------------------------------------|-----------------------------------------------------------------------|---------------------------------------------------------------|-----------------------------------------------------------|---------------------------------|-----------------------------------------------------------------------------------|-----------------------------------------------------------------------------------------------------------------|-----------------------------------------------------------------------------------|-----------------------------------------------------------------------------------|-------------------------------|-----------------------------------|-----------------------------------|
| Abedi, Tavakkoli, Jabbari, Amouhiedini, & Yadegarfar, 2017 [26] | 24 | IMRT          | mpMRI (DWI+DCE) + MRSI + histopathological data | CTV1 = Prostate + SV<br>CTV2 = Prostate                                                                 | PTV1 = CTV1 + 5<br>PTV2 = CTV2 + 5<br>PTVboost = GTV+ 5               | NR                                                            | PTV2 = 78 Gy                                              | PTVboost = 90 Gy [148.1]        | 45                                                                                | NR                                                                                                              | NR                                                                                | [Mean/Gy]: D80 = 28, D65 = 21                                                     | [Mean/Gy]: D75 = 17, D50 = 22 |                                   |                                   |
| Yeo et al.,2015 [27]                                            | 10 | IMPT          | hypothetical IPLs                               | PTV1 = SV + 5<br>PTV2 = prostate + 5<br>PTVboost = GTV + 5                                              | [GTV]<br>Vmean = 4cc                                                  | PTV1 = 50.4 Gy<br>PTV2 = 70.2 Gy                              | PTVboost = 90 Gy [142.3]                                  | 50                              | PTV2-[Mean/Gy]:<br>Dmin = 69.1;<br>Dmax = 93.4;<br>Dmean = 59.9                   | PTVboost-[Mean/Gy]: Dmin = 89.4; Dmax = 93.6; Dmean = 82.4                                                      | [Mean/Gy]: Dmean = 19.7<br>[Mean/%]: V90,80,75,70,65 = 2.8, 8.1, 10.0, 12.1, 14.1 | [Mean/Gy]: Dmean = 21.5<br>[Mean/%]: V90,75,70,65,60 = 1.1, 6.7, 9.7, 12.3, 14.6  |                               |                                   |                                   |
|                                                                 |    | IMRT          |                                                 |                                                                                                         |                                                                       |                                                               |                                                           |                                 | PTV2-[Mean/Gy]:<br>Dmin = 67.5;<br>Dmax = 94.77;<br>Dmean = 57.4                  | PTVboost-[Mean/Gy]:Dmin = 88.0; Dmax = 97.1; Dmean = 84.5                                                       | [Mean/Gy]: Dmean = 24.5<br>[Mean/%]: V90,80,75,70,65 = 1.7, 5.0, 6.7, 8.6, 10.5   | [Mean/Gy]: Dmean = 38.9<br>[Mean/%]: V90,75,70,65,60 = 0.7, 7.3, 11.4, 15.7, 20.4 |                               |                                   |                                   |
| Kim et al., 2008 [28]                                           | 15 | Brachytherapy | MRI (T2w) + MRSI                                | PTV included the prostate only for T1c-T2b and the prostate and extra-capsular extension for T3a-T3b.   | [GTV]<br>Vmean (std) = 6.3 cc (4.3 cc); Vmin = 1.2 cc; Vmax = 15.3 cc | 100% prescribed dose = 9.5 Gy                                 | GTV = 10.45~14.25 Gy;                                     | 2                               | PTV-[Mean(SD,range) %]: V100= 93.7 (1.1, 91.9~94.9); V150 = 40.4 (3.9, 31.8~45.5) | [Mean(SD,range) %]: V120 = 99.0 (2.5, 91.4~100.0), V150 = 82.4 (21.2, 39.2~99.2), V200 = 33.2 (16.2, 11.1~59.4) | [Mean(SD,range) %]: V75% = 0.53 (0.36, 0.02~0.98)                                 | [Mean(SD,range) %]: V75% = 0.63 (0.24, 0.16~0.99)                                 |                               |                                   |                                   |
| Pouliot et al., 2004 [29]                                       | 10 | Brachytherapy | MRI (T1w+T2w) and MRSI                          | The treatment planning includes generating dose distributions for 3 different boost levels (B1, B2, B3) | Vmean = 3.6 (std:1.2), Vmedian = 3.3 (range:2.0~5.8)                  | Dmin and Dmax for prostate = 100% and 150% of prescribed dose | Dmin and Dmax for GTV = 120% and 150% of prescribed dose; | Prostate-[Mean/%]: V150% = 40.4 | GTV-[Mean/%]: V120% = 97.1                                                        | [Mean/cc]: V50% = 3.4cc; V80% = 0.6cc                                                                           | [Mean/cc]: V50% = 5.8; V80% = 0.8                                                 |                                                                                   |                               |                                   |                                   |
|                                                                 |    |               |                                                 |                                                                                                         |                                                                       |                                                               | Dmin and Dmax for GTV = 150% and 150% of prescribed dose; |                                 |                                                                                   |                                                                                                                 |                                                                                   | Prostate-[Mean/%]: V150% = 49.3                                                   | GTV-[Mean/%]: V150% = 77.8    | [Mean/cc]: V50% = 3.5; V80% = 0.6 | [Mean/cc]: V50% = 6.5; V80% = 1.2 |
|                                                                 |    |               |                                                 |                                                                                                         |                                                                       |                                                               | Dmin and Dmax for GTV = 150% and 170% of prescribed dose; |                                 |                                                                                   |                                                                                                                 |                                                                                   |                                                                                   |                               |                                   |                                   |

|                                           |    |                                             |                     |                                                                                                         |                                                                         |                                                          |                                                       |                                                          |   |                                                                                                                                          |                                                                                                                                             |    |                                              |
|-------------------------------------------|----|---------------------------------------------|---------------------|---------------------------------------------------------------------------------------------------------|-------------------------------------------------------------------------|----------------------------------------------------------|-------------------------------------------------------|----------------------------------------------------------|---|------------------------------------------------------------------------------------------------------------------------------------------|---------------------------------------------------------------------------------------------------------------------------------------------|----|----------------------------------------------|
| Crook et al., 2014 [30]                   | 22 | Brachytherapy                               | mpMRI (T2w+DCE)     | CTV (for intermediate risk) = prostate + SV<br>CTV (for high risk) = prostate + SV + pelvic lymph nodes | PTV = CTV + 10 (7 posteriorly)                                          | Vmean = 2.9 (SD: 1.8)<br>Vmedian = 7.6 (range: 2.7~39.8) | 100% prescribed dose = 10 Gy                          | GTV = 12.5 Gy                                            | 2 | [mean(SD)/Gy]:<br>D90 = 10.9 (0.2)                                                                                                       | [mean(SD)/Gy]:<br>D90 = 13.2 (1.1)<br>[mean(range)/Gy]:<br>D90 = 13.1 (11.7~17.9)                                                           | NR | Dose to 1 cc of rectal wall = 6.4Gy          |
| Kazi, Godwin, Simpson, & Sasso, 2010 [31] | 1  | EBRT+HDR Brachytherapy                      | MRI (T2w) and MRSI  | CTV1 (delineated on CT) = prostate + base of SV<br>CTV2 = prostate (delineated on MRI)                  | PTV1 = CTV1 + 5(P) + 10 (all rest directions),<br>PTV1 not exclude DIL. | NR                                                       | PTV1 = 60 Gy/30fx (by EBRT)<br>CTV2 = 7.5 Gy (By HDR) | GTV = 15 Gy (by HDR)                                     | 1 | For HDR brachytherapy and for CTV2:<br>Dmean (Dmin,Dmax) = 14.9 (7.1-241.0) Gy;<br>D90,100 = 9.0, 7.5 Gy                                 | For HDR brachytherapy and for GTV:<br>Dmean (Dmin,Dmax) = 29.8 (15.1-124.7) Gy;<br>D90,100 = 18.4, 15.8Gy                                   | NR | NR                                           |
| DiBiase et al., 2002 [32]                 | 14 | Brachytherapy                               | MRSI + T2w          | CTV = prostate                                                                                          | PTV = CTV + 2-3 mm margin in all dimensions except posteriorly          | NR                                                       | 100% prescribed dose = 145 Gy                         | GTV = 188 Gy, 130% of the prescribed dose                |   | NR                                                                                                                                       | NR                                                                                                                                          | NR | [Mean(range)/%]:<br>Dmax = 110 (74-150)      |
| Mason et al., 2014 [33]                   | 15 | Brachytherapy                               | mpMRI (DWI+T2w+DCE) | CTV = prostate                                                                                          | PTV1 = CTV + 3 (0 posteriorly)<br>PTVboost = GTV + 4.5                  | [GTV]<br>Vmedian = 1.9 cc (range, 0.4~23.0 cc)           | 100% prescribed dose = 15 Gy                          | aims to achieved 150~200% of prescribed dose to PTVboost | 1 | CTV-<br>[Median(range)/%]: D90% = 16.9 (16.6~17.6);<br>V100% = 99.5 (98.5~99.8);<br>V150% = 34.8 (24.3~44.9);<br>V200% = 8.8 (6.2~13.6)  | GTV-<br>[Median(range)/Gy]: D90 = 22.6 (17.5~32.3)<br>-<br>[Median(range)/%]: V100% = 100; V150% = 90.9 (32.2~100); V200% = 26.4 (10.0~100) | NR | [Median(range)/Gy]:<br>D2cc = 9.0 (6.8~10.4) |
|                                           |    | Brachytherapy (with additional HDR needles) |                     |                                                                                                         |                                                                         |                                                          |                                                       |                                                          |   | CTV-<br>[Median(range)/%]: D90% = 17.0 (16.2~17.5);<br>V100% = 99.4 (98.0~99.9);<br>V150% = 40.7 (24.6~52.3);<br>V200% = 10.8 (5.3~16.7) | GTV-<br>[Median(range)/Gy]: D90 = 23.4 (17.9~37.5)<br>-<br>[Median(range)/%]: V100% = 100; V150% = 99.2 (39.2~100); V200% = 40 (2.7~99.5)   |    | [Median(range)/Gy]:<br>D2cc = 9.0 (6.6~10.2) |

|                              |    |               |                            |                |                                                                |                                                 |              |                  |   |    |    |    |    |
|------------------------------|----|---------------|----------------------------|----------------|----------------------------------------------------------------|-------------------------------------------------|--------------|------------------|---|----|----|----|----|
| Dankulchai et al., 2014 [34] | 13 | Brachytherapy | mpMRI (DWI+T2w+DCE) + MRSI | CTV = prostate | PTV1 = CTV + 3<br>PTVboost = GTV + 3<br>PTV2 = PTV1 - PTVboost | [GTV]<br>Vmedian = 1.6 cc<br>(range:0.1~6.1 cc) | PTV2 = 19 Gy | PTVboost = 21 Gy | ← | NR | NR | NR | NR |
|------------------------------|----|---------------|----------------------------|----------------|----------------------------------------------------------------|-------------------------------------------------|--------------|------------------|---|----|----|----|----|

## Table S2

Table S2: Summarized characteristics of reviewed trials.

| Author, year           | N   | Risk group |     |      | Hormone therapy | Initial Median PSA (mg/mL) | Lesion volume (cc) | GTV Identification modality | Treatment Modality | Volume delineation and margins (mm)                                                                                                                                                            | Prescription Dose and Fractions (fx)                                          | Median Follow-up time | Acute G2+ toxicity (G3) |        | Late G2+ toxicity |              | Clinical Outcome (or dosimetric outcome) |
|------------------------|-----|------------|-----|------|-----------------|----------------------------|--------------------|-----------------------------|--------------------|------------------------------------------------------------------------------------------------------------------------------------------------------------------------------------------------|-------------------------------------------------------------------------------|-----------------------|-------------------------|--------|-------------------|--------------|------------------------------------------|
|                        |     | L          | I   | H    |                 |                            |                    |                             |                    |                                                                                                                                                                                                |                                                                               |                       | GU                      | GI     | GU                | GI           |                                          |
| Tree et al., 2023 [35] | 55  | 0%         | 73% | 27%  | 100%            | 11 (IQR: 7.4-17)           | NR                 | mpMRI (T2w + DWI)           | IMRT + VMAT        | PTV1 = (prostate + SV) + 6<br>PTV2 = (prostate + based of SV) + 6 (3 posteriorly)<br>PTV3 = (prostate + based of SV) + 3 (0 posteriorly)<br>PTVboost = GTV + 2<br>PTV4 = pelvic lymph node + 5 | PTV1 = 60/37 fx<br>PTV2 = 71/37 fx<br>PTV3 = 74 Gy/37 fx<br>GTV = 82 Gy/37 fx | 5 years               | 38.20%                  | 10.90% | 16.6% (3.7%)      | 12.8% (0%)   | 5-year bDFS = 98.2%                      |
|                        | 153 | 0%         | 46% | 54%  |                 | 10.7 (IQR: 7.6-15.0)       |                    |                             |                    | PTV1 = 48.6/20 fx<br>PTV2 = 57.6/20 fx<br>Prostate = 60 Gy/20 fx<br>GTV = 67 Gy/20 fx                                                                                                          |                                                                               |                       | 38.90%                  | 13.70% | 20.2% (2%)        | 15.5% (0.9%) | 5-year bDFS = 96.7%                      |
|                        | 48  | 0%         | 0%  | 100% |                 | 15.5 (IQR: 7.9-26.7)       |                    |                             |                    | PTV4 = 60 Gy/37fx<br>PTV1 = 60/37 fx<br>PTV2 = 71/37 fx<br>PTV3 = 74 Gy/37 fx<br>GTV = 82 Gy/37 fx                                                                                             |                                                                               |                       | 37.50%                  | 14.60% | 20.7% (2.5%)      | 23.4% (2.7%) | 5-year bDFS = 95.1%                      |

|                              |     |     |     |     |      |                         |                              |                                    |                                 |                                                                                               |                                                                                                                                                     |                        |              |             |           |           |                                                                            |
|------------------------------|-----|-----|-----|-----|------|-------------------------|------------------------------|------------------------------------|---------------------------------|-----------------------------------------------------------------------------------------------|-----------------------------------------------------------------------------------------------------------------------------------------------------|------------------------|--------------|-------------|-----------|-----------|----------------------------------------------------------------------------|
| Eade et al., 2022 [36]       | 112 | 2%  | 79% | 20% | 5%   | NR                      | NR                           | PET-CT + mpMRI                     | IMRT                            | PTV = CTV (prostate + proximal SV) + 5 (3 posteriorly)                                        | GTV = 45 Gy/5fx<br>CTV = 40 Gy/5fx<br>PTV = 36.25 Gy/5fx                                                                                            | 2.3 years              | NR           | NR          | NR        | NR        | 3-year estimated BF for IR= 1%<br>3-year estimated BF for HR= 15%          |
| Strnad et al., 2022 [37]     | 101 | 22% | 31% | 48% | 32%  | NR                      | NR                           | TRUS                               | IMRT + PDR-OR HDR-Brachytherapy | [EBRT]: PTV = (prostate + SV) + 5-10                                                          | [EBRT]: PTV = up to 50.4 Gy/28fx<br>[PDR]: prostate = 35 Gy in 1 session; GTV = 40 Gy/2fx<br>[HDR]: prostate = 9-9.5 Gy/2fx; GTV = 21.6-22.8 Gy/2fx | [Median]: 65 months    | NR           | NR          | 9% (4%)   | 0%        | The cumulative 5 years local recurrence rate (LRR) for all patients was 1% |
|                              |     |     |     |     |      |                         |                              |                                    | PDR-OR HDR-Brachytherapy        |                                                                                               | [PDR]: prostate = 70 Gy in 2 sessions; GTV = 84 Gy in 2 sessions<br>[HDR]: prostate = 36 Gy in 2 sessions; GTV = 43.2 Gy in 2 sessions              |                        |              |             |           |           |                                                                            |
| Dankulchai et al., 2022 [38] | 45  | 7%  | 36% | 58% | 100% | 12.3 (IQR: 8.6–23.7)    | NR                           | mpMRI (T2w + DWI + DCE)            | VMAT                            | PTV = (prostate + SV + GTV) + 5 (3 posteriorly)                                               | GTV = 87.75 Gy/39fx OR 70 Gy/20fx<br>prostate = 78 Gy/39fx OR 60 Gy/20fx                                                                            | 20 (IQR: 10–25) months | 28.9% (2.2%) | 8.9% (2.2%) | 8.9% (0%) | 2.2% (0%) |                                                                            |
| Zamboglou et al., 2022 [39]  | 25  | 0%  | 24% | 76% | 32%  | 7.5 (range: 3.9 - 24.9) | Vmedian = 3.8 (IQR: 3.0-6.6) | PET-CT and mpMRI (T2w + DWI + DCE) | IMRT                            | PTV1 = CTV1 (prostate + base of SV) + 6<br>PTV2 = CTV2 (prostate) + 4<br>PTVboost = GTV + 2-4 | PTV1 = 45 Gy/14 fx<br>PTV2 = 18 Gy/6 fx<br>PTVboost = up to 75 Gy or 63 Gy/20 fx                                                                    | 6 months               | NR           | NR          | 36% (0%)  | 16% (0%)  | PTVboost-[Median(range)/Gy]: Dmean = 70 (range: 64-75)                     |

|                              |     |    |     |       |       |                     |    |                         |                          |                                                                                                                |                                                                  |                          |          |          |              |              |                                                                                |
|------------------------------|-----|----|-----|-------|-------|---------------------|----|-------------------------|--------------------------|----------------------------------------------------------------------------------------------------------------|------------------------------------------------------------------|--------------------------|----------|----------|--------------|--------------|--------------------------------------------------------------------------------|
|                              | 25  | 0% | 36% | 64%   | 44%   | 7.4 (2.6 - 26.9)    |    |                         | IMRT + HDR Brachytherapy | PTV1 = CTV1 (prostate + base of SV)<br>PTV2 = CTV2 (prostate (for ≥ cT2c: + base of SV))<br>PTVboost = GTV + 2 | [HDR]: PTV1 = 15 Gy/1fx<br>PTVboost = 17.5-19 Gy/1fx             |                          | NR       | NR       | 48% (0%)     | 12% (0%)     | PTVboost- [Median(range)/Gy]: D90 = 19 (range: 15-21)                          |
| Hannan et al., 2022 [40]     | 12  | 0% | 0%  | 100 % | 100 % | 9.7 (IQR, 5.8-19.9) | NR | mpMRI (T2w)             | VMAT                     | PTV1 = pelvic lymph node + 5<br>PTV2 = (prostate+proximal SV) + 3<br>PTVboost = GTV + 0-3                      | PTV1 = 22.5 Gy/5fx<br>PTV2 = 47.5 Gy/5fx<br>PTVboost = 50 Gy/5fx | 42 (range: 30-48) months | 25% (0%) | 13% (0%) | 22% (2%)     | 7% (0%)      | PTVboost- [Mean/Gy]: D99 = 50;<br>PTVboost- [Median(IQR)/Gy]: D99 = 49 (50-50) |
|                              | 15  |    |     |       |       |                     |    |                         |                          |                                                                                                                | PTV1 = 25 Gy/5fx<br>PTV2 = 47.5 Gy/5fx<br>PTVboost = 50 Gy/5fx   | 24 (range: 12-36) months |          |          |              |              | PTVboost- [Mean/Gy]: D99 = 50;<br>PTVboost- [Median(IQR)/Gy]: D99 = 50 (49-50) |
|                              | 13  |    |     |       |       |                     |    |                         |                          |                                                                                                                | PTV1 = 25Gy/5fx<br>PTV2 = 47.5 Gy/5fx<br>PTVboost = 52.5 Gy/5fx  | 12 (range: 12-18) months |          |          |              |              | PTVboost- [Mean/Gy]: D99 = 51;<br>PTVboost- [Median(IQR)/Gy]: D99 = 51 (52-52) |
|                              | 15  |    |     |       |       |                     |    |                         |                          |                                                                                                                | PTV1 = 25 Gy/5fx<br>PTV2 = 47.5 Gy/5fx<br>PTVboost = 55 Gy/5fx   | 7.5 (range: 3-9) months  |          |          |              |              | PTVboost- [Mean/Gy]: D99 = 51;<br>PTVboost- [Median(IQR)/Gy]: D99 = 49 (51-54) |
|                              |     |    |     |       |       |                     |    |                         |                          |                                                                                                                |                                                                  |                          |          |          |              |              |                                                                                |
| Kerkmeijer et al., 2021 [41] | 287 | 1% | 15% | 84%   | 65%   | 15.2 (SD: 14.9)     | NR | NA                      | IMRT                     | PTV = CTV (prostate + CV) + 5-8                                                                                | PTV = 77 Gy/35fx                                                 | 72 (IQR: 58-86) months   | 46.00%   | 10.10%   | 23.0% (3.5%) | 12.2% (1.4%) | 5-year bDFS: 85% (38 events; 95% CI, 80 to 89)                                 |
|                              | 284 | 1% | 15% | 84%   | 65%   | 16.3 (SD: 13.9)     | NR | mpMRI (T2w + DWI + DCE) | IMRT, VMAT               |                                                                                                                | PTV = 77 Gy/35fx<br>GTV = 95 Gy/35fx                             |                          | 42.30%   | 14.80%   | 27.8% (5.6%) | 12.7% (1.4%) | 5-year bDFS: 92%(21 events; 95% CI, 87 to 94)                                  |

|                            |                |     |     |     |      |                            |                                 |                         |      |                                                                                                  |                                                                                                  |                               |           |            |                    |                     |                                                                                                                                                                                                                |
|----------------------------|----------------|-----|-----|-----|------|----------------------------|---------------------------------|-------------------------|------|--------------------------------------------------------------------------------------------------|--------------------------------------------------------------------------------------------------|-------------------------------|-----------|------------|--------------------|---------------------|----------------------------------------------------------------------------------------------------------------------------------------------------------------------------------------------------------------|
| Zapatero et al., 2021 [42] | 30             | 13% | 50% | 37% | 50%  | 8.5 (IQR: 5.5–14.5)        | NR                              | mpMRI (T2w + DWI + DCE) | VMAT | PTV = CTV (prostate + proximal SV) + 7-9 (5-7 posteriorly)<br>PTVboost = GTV + 3 (2 posteriorly) | PTV = 76 Gy/35fx<br>PTVboost = 85.05 Gy/35fx                                                     | 30.0 (IQR: 25.5–40.27) months | 20% (0%)  | 0%         | 0%                 | 0%                  | biochemical relapse = 0%<br>PTV-<br>[Median(IQR)/Gy]:<br>Dmedian = 77.6 (77.3–78.1)<br>PTVboost-<br>[Median(IQR)/Gy]:<br>Dmedian = 85.2 (85.0–85.4)<br>GTV-<br>[Median(IQR)/Gy]:<br>Dmedian = 85.5 (85.0–86.0) |
| Rezaei et al., 2021 [43]   | 20             | 0%  | 45% | 55% | 100% | Mean PSA: 24.86 (SD: 9.5)  | Vmean = 1.73 (SD: 1.41)         | mpMRI (T2w + DWI + DCE) | IMRT | PTV = prostate + 7 (6 posteriorly)<br>PTVboost = GTV + 5                                         | PTV = 80 Gy/40fx<br>PTVboost = 80, 85, 91Gy/40fx                                                 | NR                            | NR        | NR         | NR                 | NR                  | Average DIL shrinkage: 98.83% (range: 78.9%–100%)                                                                                                                                                              |
|                            | 20             | 0%  | 40% | 62% | 100% | Mean PSA: 22.22 (SD: 10.8) | Vmean = 1.67 (SD: 1.45)         | NA                      |      | PTV = prostate + 7 (6 posteriorly)                                                               | PTV = 80 Gy/40fx                                                                                 |                               |           |            |                    |                     | Average DIL shrinkage: 81.95% (range: 38.89%–100%)                                                                                                                                                             |
| Kuisma et al., 2021 [44]   | 19 (Total: 30) | 17% | 57% | 27% | 0%   | NR                         | Vmedian = 2.6 (range: 0.3–13.0) | PET-CT (11C)            | EBRT | PTV = prostate + 8-10<br>PTVboost = GTV + 0-6                                                    | PTV = 72.9 Gy/38fx<br>PTVboost = 79.4 Gy/38fx<br>Prostate = 76.6 Gy/38 fx<br>GTV = 80.4 Gy/38 fx | 124 (range: 105–137) months   | 6.7% (0%) | 16.7% (0%) | 17.4% (0%)<br>N=23 | 4.2% (4.2%)<br>N=24 | PTVboost-<br>[Median(range)/Gy]:<br>Dmedian = 79.3 (78.0–80.1)<br>GTV-<br>[Median(range)/Gy]:<br>Dmedian = 80.2 (79.1–81.2)                                                                                    |



|                             |                   |     |     |     |      |             |                                    |                                  |                      |                                                |                                                                 |                                   |                 |                 |                 |                |                                                                                                                                                                                                                          |
|-----------------------------|-------------------|-----|-----|-----|------|-------------|------------------------------------|----------------------------------|----------------------|------------------------------------------------|-----------------------------------------------------------------|-----------------------------------|-----------------|-----------------|-----------------|----------------|--------------------------------------------------------------------------------------------------------------------------------------------------------------------------------------------------------------------------|
|                             | 11<br>(Total: 30) |     |     |     |      |             | Vmedian = 8.0<br>(range: 0.5–23.3) |                                  |                      |                                                |                                                                 |                                   |                 |                 |                 |                | PTVboost-<br>[Median(range)/Gy]:<br>Dmedian = 79.5<br>(78.0–80.2)<br>GTV-<br>[Median(range)/Gy]:<br>Dmedian = 80.7<br>(80.1–81.7)                                                                                        |
| Armstrong et al., 2021 [45] | 25                | 0%  | 44% | 56% | 100% | NR          | Vmean = 3.9<br>(range: 1.2–9.6)    | mpMRI<br>(T2w +<br>DWI +<br>DCE) | HDR<br>Brachytherapy | PTV =<br>prostate + 3<br>PTVboost =<br>GTV + 2 | GTV = 21 Gy/1<br>fx<br>PTV =<br>V15Gy>95%;<br>65%<V19Gy<75<br>% | 75<br>(range:<br>66–85)<br>months | 16%(0<br>%)     | 0%              | RiF(6%<br>)     | RiF            | PTV-<br>[Mean(range)/Gy]:<br>D90 = 16.73<br>(15.88–17.39); V19<br>= 72.9 (65.2–74.9)<br>PTVboost-<br>[Mean(range)/Gy]:<br>D90 = 23.49<br>(21.79–25.78);<br>Dmean = 30.3<br>(28.0–38.5)<br>BF = 32%; 5-year<br>bNED = 88% |
|                             | 25                | 4%  | 40% | 56% | 96%  | NR          | Vmean = 3.3<br>(range: 1.2–12.1)   |                                  |                      |                                                | GTV = 21 Gy<br>PTV =<br>V15Gy>95%;<br>V19Gy<50%                 | 57<br>(range:<br>20–71)<br>months |                 |                 |                 |                | PTV-<br>[Mean(range)/Gy]:<br>D90 = 16.09<br>(15.63–16.87); V19<br>= 58.3 (45.7–78.8)<br>PTVboost-<br>[Mean(range)/Gy]:<br>D90 = 22.96<br>(21.78–24.82);<br>Dmean = 30.2<br>(27.5–35.8)<br>BF = 28%; 5-year<br>bNED = 76% |
| Sannam et al., 2020 [46]    | 40                | 20% | 70% | 10% | 0%   | 8.3 (SD: 4) | Vmean = 2.2<br>(SD: 2.2)           | mpMRI<br>(T2w +<br>DCE +<br>DWI) | VMAT                 | PTV =prostate<br>+ 5 (3<br>laterally)          | PTV =<br>76Gy/38fx<br>GTV = up to<br>95Gy/38fx                  | 30<br>(range:<br>26–44)<br>months | 32.5%<br>(2.5%) | 10.0%<br>(2.5%) | 27.5%<br>(2.5%) | 7.5%<br>(2.5%) | GTV-<br>[Mean(SD)/Gy]:<br>D99 = 105.3 Gy<br>(2.8)                                                                                                                                                                        |

|                            |     |          |     |     |       |                             |                                  |                         |                          |                                                                                                                                                                |                                                                               |                          |              |             |              |                                               |                                                                                                        |
|----------------------------|-----|----------|-----|-----|-------|-----------------------------|----------------------------------|-------------------------|--------------------------|----------------------------------------------------------------------------------------------------------------------------------------------------------------|-------------------------------------------------------------------------------|--------------------------|--------------|-------------|--------------|-----------------------------------------------|--------------------------------------------------------------------------------------------------------|
|                            | 40  | 12%      | 83% | 5%  | 5%    | 8.1 (SD: 3)                 | Vmean = 3 (SD: 1.8)              |                         | VMAT + HDR brachytherapy | PTV =prostate + 1 (2 in cranial-caudal)                                                                                                                        | [VMAT]: PTV = 76Gy/38fx<br>[HDR]: GTV = 10Gy/1fx                              | 33 (range: 24–48) months | 40.0% (2.5%) | 10% (0.0%)  | 17.5% (0.0%) | 7.5% (0.0%)                                   | GTV-[Mean(SD)/Gy]: D99 = 103.1 Gy (6.7)                                                                |
| Nicholls et al., 2020 [47] | 8   | 0%       | NR  | NR  | 100 % | 7.4 ng/ml (range: 4.7–10.8) | Vmedia n = 0.6 (range: 0.3–3.5)  | mpMRI (T2w + DWI + DCE) | CyberKnife               | PTV = CTV(prostate + proximal SV) + 5 (3 posteriorly)                                                                                                          | PTV = 36.25/5 fx<br>GTV = 40 Gy (max:47.5)/5fx                                | 56 (range 50–74) months  | 37.50%       | 37.50%      | 12.50%       | 0%                                            | PTV-[Median(range)/Gy]: D95 = 36.55 (35.87–36.99)<br>GTV-[Median(range)/Gy]: D95 = 46.62 (44.85–48.25) |
| Murray et al., 2020 [48]   | 55  | 0%       | 73% | 27% | 100 % | 11 (IQR: 7.4-17)            | Vmedia n = 2.4 (IQR: 1.3-4.0)    | mpMRI                   | IMRT                     | PTV1 = (prostate + SV) + 6<br>PTV2 = (prostate + based of SV) + 6 (3 posteriorly)<br>PTV3 = (prostate + based of SV) + 3 (0 posteriorly)<br>PTVboost = GTV + 2 | PTV1 = 60/37 fx<br>PTV2 = 71/37 fx<br>PTV3 = 74 Gy/37 fx<br>GTV = 82 Gy/37 fx | 74.5 months              | RiF          | 11%         | 9.1% (1.8%)  | 12.8% (0%)                                    | Biological progression = 7%<br>PTVboost - [Mean(SD)/Gy]: Dmean = 82.1 (0.12)                           |
|                            | 50  | 0%       | 60% | 40% | 100 % | 11.8 (IQR: 7.9-17)          | Vmedia n = 1.7 (IQR: 0.9-2.9)    |                         |                          | PTV1 = 48.6/20 fx<br>PTV2 = 57.6/20 fx<br>Prostate = 60 Gy/20 fx<br>GTV = 67 Gy/20 fx                                                                          | 52 months                                                                     | RiF                      | 10%          | 22.1% (0%)  | 14.0% (0%)   | PTVboost - [Mean(SD)/Gy]: Dmean = 67.0 (0.02) |                                                                                                        |
| Marvaso et al., 2020 [49]  | 64  | 20%      | 80% | 0%  | 8%    | 6.07 (IQR: 4.79-7.98)       | NR                               | mpMRI                   | EBRT                     | PTV = prostate + 5 (3 posteriorly)<br>PTVboost = GTV + 3                                                                                                       | PTV = 36.25 Gy/5 fx<br>PTVboost = 37.5 Gy in 5 fx                             | NR                       | 1.54% (0%)   | 3.08% (0%)  | 4.69% (0%)   | 3.13% (1.56%)                                 | 2 years b-PFS = 97%<br>OS = 98%<br>biochemical and clinical relapse = 2 patients                       |
| Draulans et al., 2020 [50] | 100 | 0(0.0 %) | 25% | 75% | 62%   | 10.8 (range: 3.0–29.0)      | Vmedia n = 2.3 (range: 0.1-27.8) | mpMRI (T2w + DWI + DCE) | VMAT                     | CTVboost = GTV+ 4mm<br>PTV = CTV + 4 (n = 63) or 5 (n = 37)                                                                                                    | PTV = 33.25 Gy/5fx<br>GTV = 35 Gy with an iso-toxic boost up to 50 Gy/5fx     | 18 (6–30) months         | 34.0% (0.0%) | 5.0% (0.0%) | 14% (0%)     | 4% (0%)                                       | GTV-[Median(range)/Gy]: Dmean = 44.7 (37.7–50.9); D99 = 40.3 (36.2-50.7); Dmax = 48.2 (39.6-56.2)      |

|                                 |     |     |      |      |                 |                                    |                                             |                                           |                                              |                                                                                                                    |                                                                                                              |                                             |               |               |                    |                |                                                                                                                                |
|---------------------------------|-----|-----|------|------|-----------------|------------------------------------|---------------------------------------------|-------------------------------------------|----------------------------------------------|--------------------------------------------------------------------------------------------------------------------|--------------------------------------------------------------------------------------------------------------|---------------------------------------------|---------------|---------------|--------------------|----------------|--------------------------------------------------------------------------------------------------------------------------------|
| Alayed et al., 2020 [51]        | 30  | 0%  | 0%   | 100% |                 | 10.82<br>(range:<br>1.4-37.4)      |                                             | NA                                        |                                              | PTV1 = CTV1<br>(pelvic lymph<br>nodes + SV) +<br>6<br>PTV2 = CTV2<br>(Prostate) + 3                                | CTV1 =<br>25Gy/5fx<br>CTV2 =<br>40Gy/5fx<br>PTV1 =<br>23.75Gy/5fx<br>PTV2 =<br>40Gy/5fx                      | 60<br>months                                | 43.3%<br>(0%) | 3.3%<br>(0%)  | 46.7%<br>(0%)      | 23.3%<br>(0%)  | BF = 0%                                                                                                                        |
|                                 | 30  | 0%  | 37%  | 64%  | 100%            | 11.97<br>range:<br>(0.01-<br>43.2) | NR                                          | mpMRI<br>(T2w +<br>DWI +<br>DCE)          | EBRT                                         | PTV1 = CTV1<br>(pelvic lymph<br>nodes + SV) +<br>6<br>PTV2 = CTV2<br>(Prostate) + 2<br>(2.5 in cranial-<br>caudal) | CTV1 =<br>25Gy/5fx<br>CTV2 =<br>35Gy/5fx<br>PTV1 =<br>23.75Gy/5fx<br>PTV2 =<br>33.25Gy/5fx<br>GTV = 50Gy/5fx | 25<br>months                                | 67%<br>(3.3%) | 16.7%<br>(0%) | 46.7%<br>(0%)      | 13.3%<br>(0%)  | GTV-<br>[Median(range)/Gy]:<br>D90 = 48.3 (42.5-<br>51.9); D99 = 44.6<br>(39.1-49.6)                                           |
| Pollack et al.,<br>2020 [51]    | 25  | 0%  | 0%   | 100% | 14<br>(56%<br>) | 5.8<br>(range:<br>3.1-18.9)        | Vmean<br>= 2.5<br>(range:<br>0.60-<br>8.06) | mpMRI<br>(T1w +<br>T2w +<br>DWI +<br>DCE) | CyberK<br>nife +<br>IMRT                     | PTV =<br>(Ptostate +<br>SV) + 3-5                                                                                  | PTV = 76<br>Gy/38fx<br>GTV = 88-90<br>Gy/38fx (12-14<br>Gy in day 1)                                         | 66.2<br>(range:<br>20.8-<br>71.1)<br>months | 52%<br>(0%)   | 20%<br>(0%)   | 12%<br>(G4:<br>4%) | 16%<br>(0%)    | BF = 8%; bFFS:<br>92%<br>GTV-<br>[Mean(range)/Gy]:<br>D95 = 7.62 (1.69-<br>12.58) (day 1)                                      |
| Herrera et al., 2019 [52]       | 9   |     |      |      |                 |                                    |                                             |                                           |                                              |                                                                                                                    |                                                                                                              |                                             |               |               |                    |                | PTVboost-<br>[Median(range)/Gy]:<br>Dmean = 50 (47-<br>55); D95 = 45 (40-<br>50.4)                                             |
|                                 | 11  | 35% | 65%  | 0%   | 5%              | 12.3<br>(range,<br>2.7-40)         | Vmedia<br>n = 2<br>(range:<br>0.6-4)        | mpMRI<br>(T2w)                            | CyberK<br>nife                               | PTV =<br>prostate + 3<br>PTVboost =<br>GTV + 3                                                                     | PTV =<br>36.25Gy/5fx<br>PTVboost = 45,<br>47.5, or 50 Gy/5<br>fx                                             | 24<br>(range:<br>6-39)<br>months            | 25%<br>(0.0%) | 10%<br>(0.0%) | 5.0%<br>(0.0%)     | 0.0%<br>(0.0%) | PTVboost-<br>[Median(range)/Gy]:<br>Dmean = 53 (50-<br>57); D95 = 48 (40-<br>51.3)                                             |
| McDonald et<br>al., 2019 [53]   | 26  | 23% | 77%  | 0%   | 31%             | 6.1<br>(range:<br>2.5-17.6)        | Vmedia<br>n = 2.1<br>(range:<br>0.1-6.2)    | MRI<br>(T1,<br>T2)                        | EBRT                                         | PTV = prostat<br>+5 (3<br>posteriorly)<br>PTVboost =<br>CTVboost<br>(GTV + 5)+5(3<br>posteriorly)                  | PTV =<br>36.25Gy/5fx<br>PTVboost =<br>40Gy/5fx                                                               | < 90<br>days                                | NR            | NR            | NR                 | NR             | PTVboost-<br>[Median(range)/%]:<br>V40Gy = 88 (50.2-<br>100);<br>PTV-<br>[Median(range)/%]:<br>V36.25Gy = 95.1<br>(43.3-99.9); |
| Guimond<br>et al.,<br>2019 [54] | 110 | 0%  | 100% | 0%   | 7%              | 6.3<br>(range:3.<br>2-10.1)        | NA                                          | NA                                        | LDR<br>Brachyt<br>herapy<br>(I-125<br>seeds) | PTV =<br>prostate + 3                                                                                              | PTV = 144 Gy<br>(100%)                                                                                       | 82<br>(range:<br>60-<br>100)<br>months      | 33.3%<br>(0%) | 0%            | 36.6%<br>(0%)      | 0%             | Estimated 7-year<br>bDFS: 89%                                                                                                  |

|                              |    |     |      |      |      |                               |                                                 |                                          |                      |                                                                                                                                      |                                                                              |                                         |               |            |               |              |                                                                                                                                                                                       |
|------------------------------|----|-----|------|------|------|-------------------------------|-------------------------------------------------|------------------------------------------|----------------------|--------------------------------------------------------------------------------------------------------------------------------------|------------------------------------------------------------------------------|-----------------------------------------|---------------|------------|---------------|--------------|---------------------------------------------------------------------------------------------------------------------------------------------------------------------------------------|
|                              | 55 | 0%  | 100% | 0%   | 22%  | 6.1 (4.1–11.0)                | Vmedia<br>n = 4.3<br>(range:<br>2.6–6.2)        | double-<br>sextant<br>biopsies +<br>TRUS |                      |                                                                                                                                      | PTV = 144 Gy<br>(100%)<br>GTV = 216 Gy<br>(150%)                             | 71<br>(range:<br>60–92)<br>months       | 46.2%<br>(0%) | 0%         | 39.7%<br>(2%) | 0%           | Estimated 7-year<br>bDFS: 96%                                                                                                                                                         |
| Alayed et al., 2019<br>[55]  | 60 | 8%  | 92%  | 0%   | 0%   | 6.24<br>(range:<br>2.2, 16.4) | Vmedia<br>n = 3.1                               | mpMRI<br>(T2w +<br>DWI +<br>DCE)         | HDR<br>Brachytherapy |                                                                                                                                      | Prostate = 19<br>Gy/1 fx<br>GTV = 23 Gy/1<br>fx                              | 39<br>months                            | 21.7%<br>(0%) | 0%<br>(0%) | 15%<br>(0%)   | 1.6%<br>(0%) | BF = 18.3%;<br>GTV-<br>[Median(range)/Gy]:<br>D90 = 27.2 (20.9-<br>35.7)<br>Prostate-<br>[Median(range)/%]:<br>V100% = 96.9%<br>(93.8, 99.7)                                          |
| Timon et al.,<br>2018 [56]   | 13 | 23% | 77%  | 0%   | 8%   | 5.8<br>(range:<br>4.3–17)     | Vmedia<br>n = 1.18<br>(range:<br>0.20–<br>5.40) | mpMRI<br>(T2w +<br>DWI +<br>DCE)         | EBRT                 | PTV =<br>prostate + 5 (3<br>posteriorly)<br>PTVboost =<br>GTV + 3                                                                    | PTV = 36.25<br>Gy/5fx<br>PTVboost = 37.5<br>Gy/5fx                           | 17<br>(range:<br>11–26)<br>months       | 7.70%         | 0%         | NR            | NR           | Median D95, D95,<br>and D98 of the<br>PTV, PTVboost,<br>and GTV were:<br>97.7%, 99.2 and<br>101.7%,                                                                                   |
| Schlenter et al., 2018 [57]  | 67 | 42% | 27%  | 31%  | 22%  | 6 (range:<br>2–53)            | NA                                              | NA                                       | IMRT                 | PTV = CTV<br>(prostate +<br>based of SV)<br>+ 8 (5 in<br>cranial-caudal,<br>4 posteriorly)                                           | PTV = 76<br>Gy/38fx                                                          | 64<br>(Mean:<br>58)                     | NR            | NR         | NR            | NR           | 5-year biochemical<br>tumor control =<br>85%<br>5-year OS = 88%                                                                                                                       |
|                              | 67 | 43% | 37%  | 19%  | 13%  | 7 (range:<br>2–83)            | Vmedia<br>n = 4<br>(range:<br>0.4–37)           | PET-<br>CT                               |                      | PTV = CTV<br>(prostate +<br>based of SV)<br>+ 8 (5 in<br>cranial-caudal,<br>4 posteriorly)<br>PTVboost =<br>GTV + 4                  | PTV = 76<br>Gy/38fx<br>PTVboost = 80<br>Gy/38fx                              | 66<br>(Mean:<br>60)                     |               |            |               |              | 5-year biochemical<br>tumor control =<br>92%<br>5-year OS = 100%                                                                                                                      |
| Onjukka et al., 2017<br>[58] | 28 | 0%  | 0%   | 100% | 100% | 12<br>(range:<br>4.6–59)      | Vmedia<br>n = 4.3<br>(range:<br>0.46–<br>15)    | mpMRI<br>(DWI)                           | VMAT                 | PTV1 = CTV1<br>(Prostate +<br>SV) + 9<br>PTV2 = CTV2<br>(prostate +<br>base of SV) +<br>5<br>PTVboost =<br>CTVboost<br>(GTV + 3) + 2 | PTV1 = 53<br>Gy/20fx<br>PTV2 = 60<br>Gy/20fx<br>PTVboost = up<br>limit 68 Gy | 38<br>(range:<br>32 to<br>45)<br>months | 0%            | 0%         | 7.1%<br>(0%)  | 0%           | 3 patients relapsed<br>PTV2-<br>[Mean(range)/Gy]:<br>Dmean = 61 (61-<br>63); D98 = 59 (58-<br>60)<br>PTVboost-<br>[Mean(range)/Gy]:<br>Dmedian = 67 (63-<br>71); D98 = 63 (58-<br>65) |

|                                    |     |     |      |      |      |                              |                                |                                |                           |                                                                                                                                 |                                                                                     |                                  |          |            |            |          |                                                                                                                                        |
|------------------------------------|-----|-----|------|------|------|------------------------------|--------------------------------|--------------------------------|---------------------------|---------------------------------------------------------------------------------------------------------------------------------|-------------------------------------------------------------------------------------|----------------------------------|----------|------------|------------|----------|----------------------------------------------------------------------------------------------------------------------------------------|
| Uzan, Nahum, & Syndikus, 2016 [59] | 11  | 0%  | 0%   | 100% | 100% | [Mean]: 15.9 (range: 6.8-51) | Vmean = 5.3 (range: 1.9-11.1)  | functional MRI                 | IMRT (5 beams)            | PTV1 = CTV1 (Prostate + SV) + 9<br>PTV2 = CTV2 (prostate + base of SV) + 5 (2 posteriorly)<br>PTVboost = CTVboost (GTV + 3) + 2 | PTV1 = 64 in 37fx<br>PTV2 = 74 in 37fx<br>PTVboost = Radiobiologically optimised    | [Mean]: 36 (range: 24-50) months | NR (0%)  | 9.1% (0%)  | 18.2% (0%) | 0%       | PTV2- [Mean(range)/Gy]: Dmedian = 75.4 (75.1-75.8);<br>PTVboost- [Mean(range)/Gy]: Dmedian = 86.4 (80.3-90.9);<br>One patient relapsed |
| Sundahl et al., 2016 [60]          | 185 | 10% | 50%  | 40%  | 100% | NR                           | NA                             | NA                             | IMRT                      | PTV = CTV(prostate + SV) + 3                                                                                                    | PTV = 78 Gy/38fx                                                                    | 72 (range: 6-144) months         | NR       | 33%        | NR         | 13%      | 6-years bRFS = 84±3%                                                                                                                   |
|                                    | 225 | 2%  | 43%  | 55%  | 100% |                              | Vmean = 4.11 (range: 1-42)     | mpMRI (T2w + DWI + DCE) + MRSI |                           |                                                                                                                                 | PTV = 78 Gy/38fx<br>GTV = 82 Gy/38fx                                                | 60 (range: 1-132) months         |          | 29%        |            | 10%      |                                                                                                                                        |
| King et al., 2016 [61]             | 47  | 74% | 26%  | 0%   | 17%  | 5.1 (IQR: 3.8-7.0)           | Vmedia n = 0.29                | mpMRI (T2w + T1w) + MRSI       | LDR brachyt herapy (125I) |                                                                                                                                 | CTV = 144 Gy (100%)<br>GTV = 216 Gy (150%)                                          | 86.4 (IQR: 49.8-117.6) months    | 60% (0%) | 32% (11%)  | 4% (0%)    | 15% (2%) | 10-year PSA relapseefree survival estimates were 100% and 89% (71-100%) for low- and intermediaterisk patients                         |
| Gomez-Iturriaga et al., 2016 [62]  | 15  | 0%  | 100% | 0%   | NR   | NR                           | Vmedia n = 1.4 (range: 1.3-18) | mpMRI (T2w + T1w +DWI) + MRSI  | EBRT + HDR brachyt herapy |                                                                                                                                 | [EBRT]: prostate = 37.5 Gy/5fx<br>[HDR]: prostate = 15 Gy/1fx<br>GTV = 18.75 Gy/1fx | 18 (range: 17-24) months         | 20% (0%) | 13.4% (0%) | 6.7% (0%)  | 0%       | Prostate- [Median(range)/Gy]: D90 = 110.7 (107.9-113.6)<br>GTV- [Median(range)/Gy]: D90 = 142.7 (131.4-151.7)                          |
| Crook et al. 2014 [30]             | 22  | NR  | NR   | NR   | NR   | Mean PSA: 10.4 (SD: 4.4)     | Vmean = 2.9 (SD: 1.8)          | mpMRI (T2w + DWI + DCE)        | EBRT + HDR brachyt herapy |                                                                                                                                 | [EBRT]: prostate = 46 Gy/23fx<br>[HDR]: prostate = 10 Gy/1fx<br>GTV = 12.5 Gy/1fx   | NR                               | NR       | NR         | NR         | NR       | GTV- [Median(range)/Gy]: D90 = 13.1 (11.7-17.9)                                                                                        |

|                                                     |    |     |     |     |                 |                                    |                                            |                                  |                                 |                                                                                                                        |                                                                                         |                                     |                 |                 |                 |                 |                                                                                                                                                             |
|-----------------------------------------------------|----|-----|-----|-----|-----------------|------------------------------------|--------------------------------------------|----------------------------------|---------------------------------|------------------------------------------------------------------------------------------------------------------------|-----------------------------------------------------------------------------------------|-------------------------------------|-----------------|-----------------|-----------------|-----------------|-------------------------------------------------------------------------------------------------------------------------------------------------------------|
| Ennis et al., 2015 [63]                             | 14 | NR  | NR  | NR  | NR              | 5.44<br>(range:<br>2.37-<br>7.40)  | NR                                         | Ultrasound                       | LDR<br>brachytherapy<br>(103Pd) | PTV =<br>prostate + 2                                                                                                  | PTV = 100%<br>GTV = 200%                                                                | 31.5<br>(range:<br>24-52)<br>months | NR              | NR              | NR              | NR              | No patients<br>experienced<br>biochemical<br>recurrence after the<br>median follow-up<br>time.                                                              |
| Schild et al., 2014 [64]                            | 78 | NR  | NR  | NR  | not<br>100<br>% | NR                                 | Vmedian<br>n =<br>2.18                     | mpMRI<br>(T2w +<br>DWI +<br>DCE) | IMRT<br>OR<br>VMAT              | PTV =<br>prostate + 3                                                                                                  | Prostate = 77.4<br>Gy/43fx<br>GTV = 83<br>Gy/43fx<br>Involved SV =<br>75-77.4 Gy/43fx   | 36<br>(range:<br>4-57)<br>months    | NR              | NR              | NR              | NR              | 3-year biochemical<br>control rate = 92%<br>3-year rates of local<br>control, distant<br>control and survival<br>were 98%, 95%,<br>and 95%,<br>respectively |
| Aluwini et al., 2013 [65]                           | 50 | 60% | 40% | 0%  | 100<br>%        | Mean<br>PSA: 8.2<br>(1.3–16)       | Vmean<br>= 1.2<br>(range:<br>0.46–<br>4.1) | MRI                              | Cyberknife                      | PTV =<br>prostate + 3                                                                                                  | PTV = 38 Gy in<br>4fx<br>GTV = up to 44<br>Gy (for 14<br>patients who<br>detected IPLs) | [Mean]:<br>23 (9–<br>47)<br>months  | 23%(8<br>%)     | 14%(2<br>%)     | 16%             | 3%              | GTV-<br>[Mean(range)/Gy]:<br>Dmean = 47.8<br>(40.3–53.8)<br>BF = 0%                                                                                         |
| Buwenge et al., 2020;<br>Ippolito et al., 2012 [66] | 44 | 14% | 41% | 46% | 100<br>%        | 6.11<br>(range:<br>2.28-<br>36.00) | NR                                         | MRI<br>(T2w)                     | IMRT                            | PTV =<br>(prostate +<br>SV) + 1cm (8<br>mm<br>posteriorly)<br>PTVboost =<br>(GTV + 5mm)<br>+ 1cm (8 mm<br>posteriorly) | PTV = 72<br>Gy/40fx<br>PTVboost = 80<br>Gy/40fx                                         | 120<br>(range:<br>25-150)<br>months | 27.3%<br>(2.3%) | 13.6%<br>(4.5%) | 13.6%<br>(4.5%) | 16.1%<br>(2.3%) | bFFS: 95.3% (5 yr);<br>90.1% (10 yr)<br>OS: 95.5% (5<br>yr)/87.8% (10 yr);                                                                                  |

## Reference

1. Cambria, R., et al., *Ultrahypofractionated radiotherapy for localized prostate cancer with simultaneous boost to the dominant intraprostatic lesion: a plan comparison*. Tumori, 2021: p. 3008916211011667-3008916211011667.
2. Udrescu, C., et al., *Potential interest of developing an integrated boost dose escalation for stereotactic irradiation of primary prostate cancer*. Physica medica, 2013. **30**(3): p. 320-325.
3. Kim, Y.J., K.J. Yoon, and Y.S. Kim, *Simultaneous integrated boost with stereotactic radiotherapy for dominant intraprostatic lesion of localized prostate cancer: a dosimetric planning study*. Scientific reports, 2020. **10**(1): p. 14713-14713.
4. Tree, A., et al., *Prostate stereotactic body radiotherapy with simultaneous integrated boost: Which is the best planning method?* Radiation oncology (London, England), 2013. **8**(1): p. 228-228.
5. Murray, L.J.F., et al., *Prostate Stereotactic Ablative Radiation Therapy Using Volumetric Modulated Arc Therapy to Dominant Intraprostatic Lesions*. International journal of radiation oncology, biology, physics, 2014. **89**(2): p. 406-415.
6. Ashida, R., et al., *Highly hypofractionated intensity-modulated radiation therapy for nonmetastatic prostate cancer with a simultaneous integrated boost to intraprostatic lesions: a planning study*. Japanese journal of radiology, 2022. **40**(2): p. 210-218.
7. Ciabatti, S., et al., *Dominant intraprostatic lesion boosting in sexual-sparing radiotherapy of prostate cancer: A planning feasibility study*. Medical dosimetry : official journal of the American Association of Medical Dosimetrists, 2019. **44**(4): p. 356-364.
8. Azzeroni, R., et al., *Biological optimization of simultaneous boost on intra-prostatic lesions (DILs): Sensitivity to TCP parameters*. Physica medica, 2012. **29**(6): p. 592-598.
9. Amini, A., et al., *Dose painting to treat single-lobe prostate cancer with hypofractionated high-dose radiation using targeted external beam radiation: Is it feasible?* Medical Dosimetry, 2015. **40**(3): p. 256-261.
10. Thomas, L., et al., *<sup>68</sup>Ga-PSMA-PET/CT imaging of localized primary prostate cancer patients for intensity modulated radiation therapy treatment planning with integrated boost*. European journal of nuclear medicine and molecular imaging, 2018. **45**(7): p. 1170-1178.
11. Wang, T., et al., *A planning study of focal dose escalations to multiparametric MRI-defined dominant intraprostatic lesions in prostate proton radiation therapy*. British journal of radiology, 2020. **93**(1107): p. 20190845-20190845.
12. Maggio, A., et al., *Feasibility of safe ultra-high (EQD2>100 Gy) dose escalation on dominant intra-prostatic lesions (DILs) by Helical*

*Tomotherapy*. Acta oncologica, 2011. **50**(1): p. 25-34.

13. Nutting, C., et al., *Potential improvements in the therapeutic ratio of prostate cancer irradiation: dose escalation of pathologically identified tumour nodules using intensity modulated radiotherapy*. The British journal of radiology, 2002. **75**(890): p. 151-161.
14. van Lin, E.N., et al., *IMRT boost dose planning on dominant intraprostatic lesions: gold marker-based three-dimensional fusion of CT with dynamic contrast-enhanced and 1H-spectroscopic MRI*. International Journal of Radiation Oncology\* Biology\* Physics, 2006. **65**(1): p. 291-303.
15. Zamboglou, C., et al., *Focal dose escalation for prostate cancer using 68Ga-HBED-CC PSMA PET/CT and MRI: A planning study based on histology reference*. Radiation oncology (London, England), 2018. **13**(1): p. 81-81.
16. Blake, S.W., et al., *A study of the clinical, treatment planning and dosimetric feasibility of dose painting in external beam radiotherapy of prostate cancer*. Physics and Imaging in Radiation Oncology, 2020. **15**: p. 66-71.
17. Pinkawa, M., et al., *Intensity-Modulated Radiotherapy for Prostate Cancer Implementing Molecular Imaging with 18F-Choline PET-CT to Define a Simultaneous Integrated Boost*. Strahlentherapie und Onkologie, 2010. **186**(11): p. 600-606.
18. Pinkawa, M., et al., *Dose-escalation using intensity-modulated radiotherapy for prostate cancer – Evaluation of the dose distribution with and without 18 F-choline PET-CT detected simultaneous integrated boost*. Radiotherapy and oncology, 2009. **93**(2): p. 213-219.
19. Ost, P., et al., *Volumetric arc therapy and intensity-modulated radiotherapy for primary prostate radiotherapy with simultaneous integrated boost to intraprostatic lesion with 6 and 18 MV: a planning comparison study*. International Journal of Radiation Oncology\* Biology\* Physics, 2011. **79**(3): p. 920-926.
20. Bossart, E.L.P., et al., *Feasibility and Initial Dosimetric Findings for a Randomized Trial Using Dose-Painted Multiparametric Magnetic Resonance Imaging–Defined Targets in Prostate Cancer*. International journal of radiation oncology, biology, physics, 2016. **95**(2): p. 827-834.
21. De Meerleer, G., et al., *The magnetic resonance detected intraprostatic lesion in prostate cancer: planning and delivery of intensity-modulated radiotherapy*. Radiotherapy and oncology, 2005. **75**(3): p. 325-333.
22. Chang, J.H., et al., *Intensity Modulated Radiation Therapy Dose Painting for Localized Prostate Cancer Using 11C-choline Positron Emission Tomography Scans*. International journal of radiation oncology, biology, physics, 2012. **83**(5): p. e691-e696.
23. Kuang, Y.P., et al., *Volumetric Modulated Arc Therapy Planning for Primary Prostate Cancer With Selective Intraprostatic Boost Determined by 18 F-Choline PET/CT*. International journal of radiation oncology, biology, physics, 2015. **91**(5): p. 1017-1025.



24. Seppälä, J., et al., *Carbon-11 acetate PET/CT based dose escalated IMRT in prostate cancer*. Radiotherapy and Oncology, 2009. **93**(2): p. 234-240.
25. Housri, N., et al., *Parameters favorable to intraprostatic radiation dose escalation in men with localized prostate cancer*. International Journal of Radiation Oncology\* Biology\* Physics, 2011. **80**(2): p. 614-620.
26. Abedi, I., et al., *Dosimetric and Radiobiological Evaluation of Multiparametric MRI-Guided Dose Painting in Radiotherapy of Prostate Cancer*. Journal of medical signals and sensors, 2017. **7**(2): p. 114-121.
27. Yeo, I., et al., *Passive proton therapy vs. IMRT planning study with focal boost for prostate cancer*. Radiation oncology (London, England), 2015. **10**(1): p. 213-213.
28. Kim, Y., et al., *Class solution in inverse planned HDR prostate brachytherapy for dose escalation of DIL defined by combined MRI/MRSI*. Radiotherapy and oncology, 2008. **88**(1): p. 148-155.
29. Pouliot, J., et al., *Inverse planning for HDR prostate brachytherapy used to boost dominant intraprostatic lesions defined by magnetic resonance spectroscopy imaging*. International Journal of Radiation Oncology\* Biology\* Physics, 2004. **59**(4): p. 1196-1207.
30. Crook, J., et al., *Ultrasound-planned high-dose-rate prostate brachytherapy: dose painting to the dominant intraprostatic lesion*. Brachytherapy, 2014. **13**(5): p. 433-441.
31. Kazi, A., et al., *MRS-guided HDR brachytherapy boost to the dominant intraprostatic lesion in high risk localised prostate cancer*. BMC cancer, 2010. **10**(1): p. 472-472.
32. DiBiase, S.J., et al., *Magnetic resonance spectroscopic imaging-guided brachytherapy for localized prostate cancer*. International Journal of Radiation Oncology\* Biology\* Physics, 2002. **52**(2): p. 429-438.
33. Mason, J., et al., *Multi-parametric MRI-guided focal tumor boost using HDR prostate brachytherapy: A feasibility study*. Brachytherapy, 2014. **13**(2): p. 137-145.
34. Dankulchai, P., et al., *Optimal source distribution for focal boosts using high dose rate (HDR) brachytherapy alone in prostate cancer*. Radiotherapy and oncology, 2014. **113**(1): p. 121-125.
35. Tree, A.C., et al., *Standard and Hypofractionated Dose Escalation to Intraprostatic Tumor Nodules in Localized Prostate Cancer: 5-Year Efficacy and Toxicity in the DELINEATE Trial*. International journal of radiation oncology, biology, physics, 2023. **115**(2): p. 305-316.
36. Eade, T., et al., *Early Outcomes and Decision Regret Using PSMA/MRI-Guided Focal Boost for Prostate Cancer SBRT*. Practical Radiation Oncology, 2022. **12**(3): p. e201-e206.

37. Strnad, V., et al., *Brachytherapy focal dose escalation using ultrasound based tissue characterization by patients with non-metastatic prostate cancer: Five-year results from single-center phase 2 trial*. Brachytherapy, 2022. **21**(4): p. 415-423.
38. Dankulchai, P., W. Sittiwong, and W. Teerasamit, *Feasibility and safety of definite volumetric modulated arc therapy with simultaneous integrated boost to the dominant intraprostatic lesion in patients with unfavorable intermediate to high-risk prostate cancer*. Reports of practical oncology and radiotherapy, 2022. **27**(2): p. 260-267.
39. Zamboglou, C., et al., *PSMA-PET-and MRI-Based Focal Dose Escalated Radiation Therapy of Primary Prostate Cancer: Planned Safety Analysis of a Nonrandomized 2-Armed Phase 2 Trial (ARO2020-01)*. International Journal of Radiation Oncology\* Biology\* Physics, 2022. **113**(5): p. 1025-1035.
40. Hannan, R., et al., *SABR for high-risk prostate cancer: A prospective multilevel MRI-based dose escalation trial*. International Journal of Radiation Oncology\* Biology\* Physics, 2022. **113**(2): p. 290-301.
41. Kerkmeijer, L.G., et al., *Focal Boost to the Intraprostatic Tumor in External Beam Radiotherapy for Patients With Localized Prostate Cancer: Results From the FLAME Randomized Phase III Trial*. Journal of Clinical Oncology, 2021: p. JCO. 20.02873.
42. Zapatero, A., et al., *MRI-guided focal boost to dominant intraprostatic lesion using volumetric modulated arc therapy in prostate cancer. Results of a phase II trial*. British journal of radiology, 2021: p. 20210683-20210683.
43. Rezaei, S.M., et al., *The feasibility of a dose painting procedure to treat prostate cancer based on mpMR images and hierarchical clustering*. Radiation oncology (London, England), 2021. **16**(1): p. 1-182.
44. Kuisma, A., et al., *Long-term outcome of biologically guided dose-escalated radiotherapy of localized prostate cancer*. Acta oncologica, 2021: p. 1-7.
45. Armstrong, S., et al., *Single dose high-dose-rate brachytherapy with focal dose escalation for prostate cancer: Mature results of a phase 2 clinical trial*. Radiotherapy and oncology, 2021. **159**: p. 67-74.
46. Sanmamed, N., et al., *Tumor-targeted dose escalation for localized prostate cancer using MR-guided HDR brachytherapy (HDR) or integrated VMAT (IB-VMAT) boost: Dosimetry, toxicity and health related quality of life*. Radiotherapy and Oncology, 2020. **149**: p. 240-245.
47. Nicholls, L., et al., *Stereotactic radiotherapy with focal boost for intermediate and high-risk prostate cancer: Initial results of the SPARC trial*. Clinical and Translational Radiation Oncology, 2020. **25**: p. 88-93.
48. Murray, J.R., et al., *Standard and hypofractionated dose escalation to intraprostatic tumor nodules in localized prostate cancer: efficacy*

*and toxicity in the DELINEATE trial*. International Journal of Radiation Oncology\* Biology\* Physics, 2020. **106**(4): p. 715-724.

49. Marvaso, G., et al., *Phase II prospective trial "Give Me Five" short-term high precision radiotherapy for early prostate cancer with simultaneous boost to the dominant intraprostatic lesion: the impact of toxicity on quality of life (AIRC IG-13218)*. Medical oncology (Northwood, London, England), 2020. **37**(8): p. 74-74.
50. Draulans, C., et al., *Primary endpoint analysis of the multicentre phase II hypo-FLAME trial for intermediate and high risk prostate cancer*. Radiotherapy and Oncology, 2020. **147**: p. 92-98.
51. Alayed, Y., et al., *Evaluating the tolerability of a simultaneous focal boost to the gross tumor in prostate SABR: a toxicity and quality-of-life comparison of two prospective trials*. International Journal of Radiation Oncology\* Biology\* Physics, 2020. **107**(1): p. 136-142.
52. Herrera, F.G., et al., *50-Gy stereotactic body radiation therapy to the dominant intraprostatic nodule: results from a phase 1a/b trial*. International Journal of Radiation Oncology\* Biology\* Physics, 2019. **103**(2): p. 320-334.
53. McDonald, A.M., et al., *Prostate stereotactic body radiation therapy with a focal simultaneous integrated boost: acute toxicity and dosimetry results from a prospective trial*. Advances in radiation oncology, 2019. **4**(1): p. 90-95.
54. Guimond, E., et al., *Impact of a dominant intraprostatic lesion (DIL) boost defined by sextant biopsy in permanent I-125 prostate implants on biochemical disease free survival (bDFS) and toxicity outcomes*. Radiotherapy and oncology, 2019. **133**: p. 62-67.
55. Alayed, Y., et al., *MRI assisted focal boost integrated with HDR monotherapy study in low and intermediate risk prostate cancer (MARS): Results from a phase II clinical trial*. Radiotherapy and oncology, 2019. **141**: p. 144-148.
56. Timon, G., et al., *Short-term high precision radiotherapy for early prostate cancer with concomitant boost to the dominant lesion: Ad interim analysis and preliminary results of Phase II trial AIRC-IG-13218*. British journal of radiology, 2018. **91**(1089): p. 20160725-20160725.
57. Schlenter, M., et al., *Intensity-modulated radiotherapy of prostate cancer with simultaneous integrated boost after molecular imaging with 18F-choline-PET/CT: Clinical results and quality of life*. Strahlentherapie und Onkologie, 2018. **194**(7): p. 638-645.
58. Onjukka, E., et al., *Twenty fraction prostate radiotherapy with intra-prostatic boost: results of a pilot study*. Clinical Oncology, 2017. **29**(1): p. 6-14.
59. Uzan, J., A. Nahum, and I. Syndikus, *Prostate dose-painting radiotherapy and radiobiological guided optimisation enhances the therapeutic ratio*. Clinical Oncology, 2016. **28**(3): p. 165-170.
60. Sundahl, N., et al., *Combining high dose external beam radiotherapy with a simultaneous integrated boost to the dominant intraprostatic lesion: Analysis of genito-urinary and rectal toxicity* Toxicity after integrated boost for prostate cancer. Radiotherapy and oncology, 2016.

**119**(3): p. 398-404.

61. King, M.T., et al., *Long-term outcome of magnetic resonance spectroscopic image–directed dose escalation for prostate brachytherapy*. Brachytherapy, 2016. **15**(3): p. 266-273.
62. Gomez-Iturriaga, A., et al., *Dose escalation to dominant intraprostatic lesions with MRI-transrectal ultrasound fusion High-Dose-Rate prostate brachytherapy. Prospective phase II trial*. Radiotherapy and oncology, 2016. **119**(1): p. 91-96.
63. Ennis, R.D., et al., *Phase I/II prospective trial of cancer-specific imaging using ultrasound spectrum analysis tissue-type imaging to guide dose-painting prostate brachytherapy*. Brachytherapy, 2015. **14**(6): p. 801-808.
64. Schild, M.H., et al., *Early outcome of prostate intensity modulated radiation therapy (IMRT) incorporating a simultaneous intra-prostatic MRI directed boost*. OMICS journal of radiology, 2014. **3**(4).
65. Aluwini, S., et al., *Stereotactic body radiotherapy with a focal boost to the MRI-visible tumor as monotherapy for low-and intermediate-risk prostate cancer: early results*. Radiation Oncology, 2013. **8**(1): p. 1-7.
66. Buwenge, M., et al., *Simultaneous integrated radiotherapy boost to the dominant intraprostatic lesion: final results of a phase I/II trial*. Anticancer Research, 2020. **40**(11): p. 6499-6503.
